# Supplementary material for: Infrared spectrum of the 1-cyanoadamantane cation: evidence of hydrogen transfer and cage-opening upon ionization
Source: Royal Society of Chemistry journal article supplement (doi:10.1039/d3cp03417h), 2023-01-01
Supplement: d3cp03417h1.pdf [file d3cp03417h1.pdf]

## Electronic Supporting Information

### Infrared Spectrum of the 1-Cyanoadamantane Cation: Evidence of Hydrogen Transfer and Cage-Opening upon Ionization

Peter Theodore Rubli and Otto Dopfer\*

Institut für Optik und Atomare Physik, Technische Universität Berlin, Hardenbergstr. 36, 10623 Berlin (Germany)

\* Email: dopfer@physik.tu-berlin.de

**Table S1.**  $E_0$  energies (kJ mol<sup>-1</sup>) of transition state structures involved in the formation of different AdCN<sup>+</sup> isomers (B3LYP-D3BJ/cc-pVTZ).

**Tables S2-S20.** Cartesian coordinates (Å) and energies (Hartree) calculated at the B3LYP-D3BJ/cc-pVTZ level of **(S2)** AdCN, **(S3)** CC(I), **(S4)** CC(II), **(S5)** CC(III), **(S6)** CC(IV), **(S7)** OC(I), **(S8)** OC(II), **(S9)** TS(I), **(S10)** TS(II), **(S11)** TS(III), **(S12)** TS(IV), **(S13)** TS(V), **(S14)** TS(VI), **(S15)** CC(I)N<sub>2</sub>(1), **(S16)** CC(I)N<sub>2</sub>(5), **(S17)** CC(II)N<sub>2</sub>(1), **(S18)** OC(I)N<sub>2</sub>(1), **(S19)** OC(II)N<sub>2</sub>(1), and **(S20)** N<sub>2</sub>.

**Table S21.** Assignments of major vibrational frequencies (in cm<sup>-1</sup>) and their IR intensities (in km mol<sup>-1</sup>) in the mid-IR range (>2000 cm<sup>-1</sup>) computed for AdCN and various AdCN<sup>+</sup> isomers (B3LYP-D3BJ/cc-pVTZ).

**Tables S22-S26.** Unscaled vibrational frequencies (in cm<sup>-1</sup>) and their IR intensities (in km mol<sup>-1</sup>) computed at the B3LYP-D3BJ/cc-pVTZ level for **(S22)** AdCN, **(S23)** CC(I), **(S24)** CC(II), **(S25)** OC(I), and **(S26)** OC(II).

**Figure S1. (a)** Typical mass spectrum of the EI ion source for an expansion of AdCN seeded in Ar (15 bar), along with major assignments. Major ions include AdCN<sup>+</sup> ( $m/z$  161), AdCN<sup>+</sup>L clusters with L=Ar/N<sub>2</sub> ( $m/z$  201/189), and fragment ions F<sup>+</sup> of AdCN ( $m/z$  27, 39, 53, 69, 93, 104, 119, 134, 146). Some of the F<sup>+</sup> ions are blended by other strong ion signals, arising from Ar<sub>*n*</sub><sup>+</sup> ( $m/z$  40, 80, 120, 160), ArN<sub>2</sub><sup>+</sup> ( $m/z$  68). Cluster ions of H<sub>2</sub>O and O<sub>2</sub> result from H<sub>2</sub>O/O<sub>2</sub> impurities in the gas inlet system. Similarly, AdCN<sup>+</sup>N<sub>2</sub> clusters stem from remaining N<sub>2</sub> carrier gas used before Ar. **(b)** EI mass spectrum of the NIST data base (70 eV) along with major fragment ions. This spectrum agrees well with the EI mass spectrum of our EI ion source, confirming the identification of the  $m/z$  161 peak as AdCN.

**Figure S2.** Collision-induced dissociation (CID) spectra of size-selected AdCN<sup>+</sup>L<sub>*n*</sub> clusters with **(a)** L=Ar ( $n=1$ ) and **(c)** L=N<sub>2</sub> ( $n=1$ ) obtained by mass-selecting the parent ion with the first quadrupole and scanning the second quadrupole (mode parent → x). The exclusive loss of ligands confirms the identity of the parent clusters as AdCN<sup>+</sup>L. Also shown are the CID spectra obtained by scanning the first quadrupole, while keeping the second quadrupole at the mass of the AdCN<sup>+</sup> fragment to identify AdCN<sup>+</sup>L<sub>*n*</sub> cluster ions produced in the EI source for **(b)** L=Ar and **(d)** L=N<sub>2</sub> (mode parent x → AdCN<sup>+</sup>). CID spectra **(a)** and **(b)** are obtained at 15 bar Ar carrier gas, while **(c)** and **(d)** are obtained at 12 bar N<sub>2</sub> carrier gas. These CID spectra show the production of AdCN<sup>+</sup>Ar<sub>*n=1-2*</sub>, AdCN<sup>+</sup>(N<sub>2</sub>)<sub>*n=1-2*</sub>, and AdCN<sup>+</sup>H<sub>2</sub>O clusters in the EI source.

**Figure S3.** Equilibrium structures (in Å and degrees) of all relevant AdCN<sup>(+)</sup> monomer structures in their ground electronic states (B3LYP-D3BJ/cc-pVTZ). The acidic CH protons of **CC(I)** and **OC(I)** are indicated in red.

**Figure S4-S7.** Calculated equilibrium structures and associated  $E_0$  and  $D_0$  energies (kJ mol<sup>-1</sup>, B3LYP-D3BJ/cc-pVTZ) of all N<sub>2</sub> cluster isomers of **(S4) CC(I)** (acidic proton indicated in red), **(S5) CC(II)**, **(S6) OC(I)**, and **(S7) OC(II)**.

**Figure S8.** Calculated structures (in Å and degrees) of all transition state structures (B3LYP-D3BJ/cc-pVTZ).

**Figure S9.** NBO charge distributions (in  $m_e$ ) of AdCN and the AdCN<sup>+</sup> isomers **CC(I)**, **CC(II)**, **OC(I)**, and **OC(II)** in their ground electronic states (B3LYP-D3BJ/cc-pVTZ).

**Figure S10.** Spin density distributions of the AdCN<sup>+</sup> isomers **CC(I)**, **CC(II)**, **OC(I)**, and **OC(II)** in their ground electronic states (B3LYP-D3BJ/cc-pVTZ).

**Figure S11.** Calculated IR spectrum of neutral AdCN compared with calculated IR spectrum of isomer **CC(I)** of AdCN<sup>+</sup> (B3LYP-D3BJ/cc-pVTZ). Computed scaled harmonic stick spectra are convoluted with Gaussian line profiles (FWHM=10 cm<sup>-1</sup>).

**Figure S12.** Calculated IR spectra of isomers **CC(II-IV)** (B3LYP-D3BJ/cc-pVTZ). Computed scaled harmonic stick spectra are convoluted with Gaussian line profiles (FWHM=10 cm<sup>-1</sup>).

**Figure S13.** Calculated IR spectra of isomers **OC(I)** and **OC(II)** (B3LYP-D3BJ/cc-pVTZ). Computed scaled harmonic stick spectra are convoluted with Gaussian line profiles (FWHM=10 cm<sup>-1</sup>).

**Figure S14.** HOMO orbitals of AdCN and various closed-cage and open-cage isomers evaluated at the B3LYP-D3/cc-pVTZ level.

**Figure S15.** Calculated equilibrium structures (B3LYP-D3BJ/cc-pVTZ) of all closed-cage isomers **CC(I-IV)** with hydrogen groups 1-3 labelled in red for **CC(I)**. Red arrows indicate from which C site the H atom migrates to the N atom of the CN group.

**Table S1.**  $E_0$  energies (kJ mol<sup>-1</sup>) of transition states (**TS**) involved in the formation of different AdCN<sup>+</sup> isomers (B3LYP-D3BJ/cc-pVTZ, Figure 4).

| Start Structure | End Structure  | $E_0$ of <b>TS</b> relative to Start Structure | <b>TS</b>      |
|-----------------|----------------|------------------------------------------------|----------------|
| <b>CC(I)</b>    | <b>CC(IV)</b>  | +216.75                                        | <b>TS(VI)</b>  |
|                 | <b>CC(III)</b> | +185.95                                        | <b>TS(V)</b>   |
|                 | <b>CC(II)</b>  | +148.04                                        | <b>TS(IV)</b>  |
|                 | <b>OC(I)</b>   | +83.44                                         | <b>TS(III)</b> |
| <b>OC(I)</b>    | <b>OC(II)</b>  | +47.34                                         | <b>TS(II)</b>  |
| <b>CC(II)</b>   | <b>OC(II)</b>  | +6.99                                          | <b>TS(I)</b>   |

**Table S2.** Cartesian coordinates (Å) and energies (Hartree) of AdCN (B3LYP-D3BJ/cc-pVTZ)

| Center Number | Atomic Number | Atomic Type | Coordinates (Å) |           |           |
|---------------|---------------|-------------|-----------------|-----------|-----------|
|               |               |             | X               | Y         | Z         |
| 1             | 6             | 0           | -0.000000       | 1.448284  | 1.528911  |
| 2             | 1             | 0           | -0.000000       | 1.470374  | 2.620928  |
| 3             | 1             | 0           | -0.000000       | 2.485769  | 1.186492  |
| 4             | 6             | 0           | -1.254458       | 0.724261  | 1.019286  |
| 5             | 1             | 0           | -2.147609       | 1.239923  | 1.376007  |
| 6             | 6             | 0           | 1.254458        | 0.724261  | 1.019286  |
| 7             | 1             | 0           | 2.147609        | 1.239923  | 1.376007  |
| 8             | 6             | 0           | 1.254251        | -0.724142 | 1.528911  |
| 9             | 1             | 0           | 1.273382        | -0.735187 | 2.620928  |
| 10            | 1             | 0           | 2.152739        | -1.242885 | 1.186492  |
| 11            | 6             | 0           | -1.254251       | -0.724142 | 1.528911  |
| 12            | 1             | 0           | -2.152739       | -1.242885 | 1.186492  |
| 13            | 1             | 0           | -1.273382       | -0.735187 | 2.620928  |
| 14            | 6             | 0           | 0.000000        | -1.448523 | 1.019286  |
| 15            | 1             | 0           | 0.000000        | -2.479845 | 1.376007  |
| 16            | 6             | 0           | 0.000000        | -1.455966 | -0.515214 |
| 17            | 1             | 0           | 0.878707        | -1.978550 | -0.896044 |
| 18            | 1             | 0           | -0.878707       | -1.978550 | -0.896044 |
| 19            | 6             | 0           | -1.260904       | 0.727983  | -0.515214 |
| 20            | 1             | 0           | -1.274121       | 1.750257  | -0.896044 |
| 21            | 1             | 0           | -2.152828       | 0.228293  | -0.896044 |
| 22            | 6             | 0           | 1.260904        | 0.727983  | -0.515214 |
| 23            | 1             | 0           | 1.274121        | 1.750257  | -0.896044 |
| 24            | 1             | 0           | 2.152828        | 0.228293  | -0.896044 |
| 25            | 6             | 0           | 0.000000        | 0.000000  | -1.038775 |
| 26            | 6             | 0           | 0.000000        | 0.000000  | -2.498439 |
| 27            | 7             | 0           | 0.000000        | 0.000000  | -3.649208 |

Sum of electronic and zero-point Energies= -482.945442

Sum of electronic and thermal Energies= -482.936579

Sum of electronic and thermal Enthalpies= -482.935635

Sum of electronic and thermal Free Energies= -482.977694

**Table S3.** Cartesian coordinates (Å) and energies (Hartree) of **CC(I)** (B3LYP-D3BJ/cc-pVTZ)

| Center Number | Atomic Number | Atomic Type | Coordinates (Å) |           |           |
|---------------|---------------|-------------|-----------------|-----------|-----------|
|               |               |             | X               | Y         | Z         |
| 1             | 6             | 0           | 0.779586        | -1.532732 | 1.260175  |
| 2             | 1             | 0           | 0.785300        | -2.619635 | 1.268720  |
| 3             | 1             | 0           | 1.257511        | -1.164819 | 2.165939  |
| 4             | 6             | 0           | -0.736145       | -1.018239 | 1.251650  |
| 5             | 1             | 0           | -1.178502       | -1.415355 | 2.166612  |
| 6             | 6             | 0           | 1.393657        | -0.964836 | -0.000000 |
| 7             | 1             | 0           | 2.458291        | -1.315395 | -0.000000 |
| 8             | 6             | 0           | 0.779586        | -1.532732 | -1.260175 |
| 9             | 1             | 0           | 0.785300        | -2.619635 | -1.268720 |
| 10            | 1             | 0           | 1.257511        | -1.164819 | -2.165939 |
| 11            | 6             | 0           | -1.391617       | -1.580263 | -0.000000 |
| 12            | 1             | 0           | -2.451567       | -1.292540 | -0.000000 |
| 13            | 1             | 0           | -1.368984       | -2.669033 | -0.000000 |
| 14            | 6             | 0           | -0.736145       | -1.018239 | -1.251650 |
| 15            | 1             | 0           | -1.178502       | -1.415355 | -2.166612 |
| 16            | 6             | 0           | -0.736145       | 0.496619  | -1.273788 |
| 17            | 1             | 0           | -0.238871       | 0.882310  | -2.163393 |
| 18            | 1             | 0           | -1.764882       | 0.868610  | -1.318437 |
| 19            | 6             | 0           | -0.736145       | 0.496619  | 1.273788  |
| 20            | 1             | 0           | -0.238871       | 0.882310  | 2.163393  |
| 21            | 1             | 0           | -1.764882       | 0.868610  | 1.318437  |
| 22            | 6             | 0           | 1.454162        | 0.540026  | 0.000000  |
| 23            | 1             | 0           | 1.938091        | 0.942121  | 0.887072  |
| 24            | 1             | 0           | 1.938091        | 0.942121  | -0.887072 |
| 25            | 6             | 0           | -0.080073       | 1.059735  | 0.000000  |
| 26            | 6             | 0           | -0.040750       | 2.504081  | 0.000000  |
| 27            | 7             | 0           | 0.009308        | 3.655754  | 0.000000  |

Sum of electronic and zero-point Energies= -482.603223

Sum of electronic and thermal Energies= -482.593534

Sum of electronic and thermal Enthalpies= -482.59259

Sum of electronic and thermal Free Energies= -482.637629

**Table S4.** Cartesian coordinates (Å) and energies (Hartree) of **CC(II)** (B3LYP-D3BJ/cc-pVTZ)

| Center Number | Atomic Number | Atomic Type | Coordinates (Å) |           |           |
|---------------|---------------|-------------|-----------------|-----------|-----------|
|               |               |             | X               | Y         | Z         |
| 1             | 6             | 0           | 1.255981        | 1.233203  | 1.254313  |
| 2             | 1             | 0           | 2.282612        | 1.597311  | 1.261354  |
| 3             | 1             | 0           | 0.755082        | 1.611499  | 2.146486  |
| 4             | 6             | 0           | 1.255981        | -0.324893 | 1.258508  |
| 5             | 1             | 0           | 1.755934        | -0.690411 | 2.155397  |
| 6             | 6             | 0           | 0.542832        | 1.617109  | -0.000000 |
| 7             | 6             | 0           | 1.255981        | 1.233203  | -1.254313 |
| 8             | 1             | 0           | 2.282612        | 1.597311  | -1.261354 |
| 9             | 1             | 0           | 0.755082        | 1.611499  | -2.146486 |
| 10            | 6             | 0           | 1.970517        | -0.837532 | -0.000000 |
| 11            | 1             | 0           | 1.994271        | -1.929160 | -0.000000 |
| 12            | 1             | 0           | 3.006811        | -0.499234 | -0.000000 |
| 13            | 6             | 0           | 1.255981        | -0.324893 | -1.258508 |
| 14            | 1             | 0           | 1.755934        | -0.690411 | -2.155397 |
| 15            | 6             | 0           | -0.193650       | -0.833777 | -1.281428 |
| 16            | 1             | 0           | -0.714764       | -0.475111 | -2.169279 |
| 17            | 1             | 0           | -0.211751       | -1.923301 | -1.297071 |
| 18            | 6             | 0           | -0.193650       | -0.833777 | 1.281428  |
| 19            | 1             | 0           | -0.714764       | -0.475111 | 2.169279  |
| 20            | 1             | 0           | -0.211751       | -1.923301 | 1.297071  |
| 21            | 6             | 0           | -0.902602       | 1.289578  | 0.000000  |
| 22            | 1             | 0           | -1.418961       | 1.645446  | 0.890166  |
| 23            | 1             | 0           | -1.418961       | 1.645446  | -0.890166 |
| 24            | 6             | 0           | -0.921129       | -0.322764 | 0.000000  |
| 25            | 6             | 0           | -2.278699       | -0.735783 | 0.000000  |
| 26            | 7             | 0           | -3.401349       | -0.976658 | 0.000000  |
| 27            | 1             | 0           | -4.373215       | -1.223921 | 0.000000  |

Sum of electronic and zero-point Energies= -482.613498

Sum of electronic and thermal Energies= -482.603871

Sum of electronic and thermal Enthalpies= -482.602927

Sum of electronic and thermal Free Energies= -482.648017

**Table S5.** Cartesian coordinates (Å) and energies (Hartree) of **CC(III)** (B3LYP-D3BJ/cc-pVTZ)

| Center Number | Atomic Number | Atomic Type | Coordinates (Å) |           |           |
|---------------|---------------|-------------|-----------------|-----------|-----------|
|               |               |             | X               | Y         | Z         |
| 1             | 6             | 0           | 1.421312        | -1.557880 | -0.000000 |
| 2             | 1             | 0           | 2.093440        | -2.401883 | -0.000000 |
| 3             | 6             | 0           | 0.760669        | -1.085582 | 1.252707  |
| 4             | 1             | 0           | 1.283270        | -1.440211 | 2.139506  |
| 5             | 6             | 0           | 0.760669        | -1.085582 | -1.252707 |
| 6             | 1             | 0           | 1.283270        | -1.440211 | -2.139506 |
| 7             | 6             | 0           | -0.705403       | -1.587479 | -1.260943 |
| 8             | 1             | 0           | -0.717138       | -2.676383 | -1.284284 |
| 9             | 1             | 0           | -1.218383       | -1.238666 | -2.160201 |
| 10            | 6             | 0           | -0.705403       | -1.587479 | 1.260943  |
| 11            | 1             | 0           | -1.218383       | -1.238666 | 2.160201  |
| 12            | 1             | 0           | -0.717138       | -2.676383 | 1.284284  |
| 13            | 6             | 0           | -1.421324       | -1.083697 | -0.000000 |
| 14            | 1             | 0           | -2.454001       | -1.433396 | -0.000000 |
| 15            | 6             | 0           | -1.452851       | 0.451667  | 0.000000  |
| 16            | 1             | 0           | -1.969467       | 0.827145  | -0.883323 |
| 17            | 1             | 0           | -1.969467       | 0.827145  | 0.883323  |
| 18            | 6             | 0           | 0.760669        | 0.457563  | 1.284225  |
| 19            | 1             | 0           | 1.781163        | 0.837517  | 1.297358  |
| 20            | 1             | 0           | 0.241526        | 0.824741  | 2.169985  |
| 21            | 6             | 0           | 0.760669        | 0.457563  | -1.284225 |
| 22            | 1             | 0           | 1.781163        | 0.837517  | -1.297358 |
| 23            | 1             | 0           | 0.241526        | 0.824741  | -2.169985 |
| 24            | 6             | 0           | 0.024433        | 0.957658  | 0.000000  |
| 25            | 6             | 0           | 0.024093        | 2.384977  | 0.000000  |
| 26            | 7             | 0           | 0.023915        | 3.529084  | 0.000000  |
| 27            | 1             | 0           | 0.026019        | 4.533017  | 0.000000  |

Sum of electronic and zero-point Energies= -482.611343

Sum of electronic and thermal Energies= -482.601585

Sum of electronic and thermal Enthalpies= -482.600641

Sum of electronic and thermal Free Energies= -482.645968

**Table S6.** Cartesian coordinates (Å) and energies (Hartree) of **CC(IV)** (B3LYP-D3BJ/cc-pVTZ)

| Center Number | Atomic Number | Atomic Type | Coordinates (Å) |           |           |
|---------------|---------------|-------------|-----------------|-----------|-----------|
|               |               |             | X               | Y         | Z         |
| 1             | 6             | 0           | -1.227272       | -1.223009 | 1.260128  |
| 2             | 1             | 0           | -2.252830       | -1.593594 | 1.260715  |
| 3             | 1             | 0           | -0.743706       | -1.603339 | 2.160429  |
| 4             | 6             | 0           | -1.227272       | 0.311604  | 1.252854  |
| 5             | 1             | 0           | -1.727794       | 0.682823  | 2.147754  |
| 6             | 6             | 0           | -0.492703       | -1.745880 | -0.000000 |
| 7             | 1             | 0           | -0.473056       | -2.833804 | -0.000000 |
| 8             | 6             | 0           | -1.227272       | -1.223009 | -1.260128 |
| 9             | 1             | 0           | -2.252830       | -1.593594 | -1.260715 |
| 10            | 1             | 0           | -0.743706       | -1.603339 | -2.160429 |
| 11            | 6             | 0           | -1.944100       | 0.831077  | -0.000000 |
| 12            | 1             | 0           | -1.968728       | 1.922622  | -0.000000 |
| 13            | 1             | 0           | -2.979135       | 0.489322  | -0.000000 |
| 14            | 6             | 0           | -1.227272       | 0.311604  | -1.252854 |
| 15            | 1             | 0           | -1.727794       | 0.682823  | -2.147754 |
| 16            | 6             | 0           | 0.213473        | 0.842318  | -1.283041 |
| 17            | 1             | 0           | 0.737999        | 0.495954  | -2.172410 |
| 18            | 1             | 0           | 0.226949        | 1.932719  | -1.271072 |
| 19            | 6             | 0           | 0.213473        | 0.842318  | 1.283041  |
| 20            | 1             | 0           | 0.737999        | 0.495954  | 2.172410  |
| 21            | 1             | 0           | 0.226949        | 1.932719  | 1.271072  |
| 22            | 6             | 0           | 0.898080        | -1.216915 | 0.000000  |
| 23            | 1             | 0           | 1.788285        | -1.824302 | 0.000000  |
| 24            | 6             | 0           | 0.946190        | 0.291293  | 0.000000  |
| 25            | 6             | 0           | 2.291926        | 0.767159  | 0.000000  |
| 26            | 7             | 0           | 3.363236        | 1.167267  | 0.000000  |
| 27            | 1             | 0           | 4.305247        | 1.514819  | 0.000000  |

Sum of electronic and zero-point Energies= -482.610526

Sum of electronic and thermal Energies= -482.601214

Sum of electronic and thermal Enthalpies= -482.600270

Sum of electronic and thermal Free Energies= -482.644837



**Table S7.** Cartesian coordinates (Å) and energies (Hartree) of **OC(I)** (B3LYP-D3BJ/cc-pVTZ)

| Center Number | Atomic Number | Atomic Type | Coordinates (Å) |           |           |
|---------------|---------------|-------------|-----------------|-----------|-----------|
|               |               |             | X               | Y         | Z         |
| 1             | 6             | 0           | 1.080471        | 0.776156  | 1.261201  |
| 2             | 1             | 0           | 2.123466        | 1.114346  | 1.320088  |
| 3             | 1             | 0           | 0.559312        | 1.177695  | 2.127733  |
| 4             | 6             | 0           | 1.080471        | -0.772677 | 1.256645  |
| 5             | 1             | 0           | 1.581636        | -1.128265 | 2.154508  |
| 6             | 6             | 0           | 0.529213        | 1.311974  | 0.000000  |
| 7             | 1             | 0           | 0.317820        | 3.364255  | 0.000000  |
| 8             | 6             | 0           | 1.080471        | 0.776156  | -1.261201 |
| 9             | 1             | 0           | 2.123466        | 1.114346  | -1.320088 |
| 10            | 1             | 0           | 0.559312        | 1.177695  | -2.127733 |
| 11            | 6             | 0           | 1.783347        | -1.293017 | 0.000000  |
| 12            | 1             | 0           | 1.780271        | -2.383434 | 0.000000  |
| 13            | 1             | 0           | 2.828988        | -0.983080 | 0.000000  |
| 14            | 6             | 0           | 1.080471        | -0.772677 | -1.256645 |
| 15            | 1             | 0           | 1.581636        | -1.128265 | -2.154508 |
| 16            | 6             | 0           | -0.395211       | -1.235603 | -1.275252 |
| 17            | 1             | 0           | -0.925152       | -0.846064 | -2.141270 |
| 18            | 1             | 0           | -0.422114       | -2.328118 | -1.332188 |
| 19            | 6             | 0           | -0.395211       | -1.235603 | 1.275252  |
| 20            | 1             | 0           | -0.925152       | -0.846064 | 2.141270  |
| 21            | 1             | 0           | -0.422114       | -2.328118 | 1.332188  |
| 22            | 6             | 0           | -0.348929       | 2.484964  | 0.000000  |
| 23            | 1             | 0           | -0.960207       | 2.560225  | 0.896677  |
| 24            | 1             | 0           | -0.960207       | 2.560225  | -0.896677 |
| 25            | 6             | 0           | -1.033983       | -0.803448 | 0.000000  |
| 26            | 6             | 0           | -2.223504       | -0.086865 | 0.000000  |
| 27            | 7             | 0           | -3.180942       | 0.572351  | 0.000000  |

Sum of electronic and zero-point Energies= -482.619117

Sum of electronic and thermal Energies= -482.608299

Sum of electronic and thermal Enthalpies= -482.607355

Sum of electronic and thermal Free Energies= -482.655505

**Table S8.** Cartesian coordinates (Å) and energies (Hartree) of **OC(II)** (B3LYP-D3BJ/cc-pVTZ)

| Center Number | Atomic Number | Atomic Type | Coordinates (Å) |           |           |
|---------------|---------------|-------------|-----------------|-----------|-----------|
|               |               |             | X               | Y         | Z         |
| 1             | 6             | 0           | 1.180975        | 0.941813  | 1.265071  |
| 2             | 1             | 0           | 2.219002        | 1.279592  | 1.331777  |
| 3             | 1             | 0           | 0.657437        | 1.326750  | 2.139257  |
| 4             | 6             | 0           | 1.180975        | -0.601707 | 1.255840  |
| 5             | 1             | 0           | 1.686821        | -0.967189 | 2.148258  |
| 6             | 6             | 0           | 0.572432        | 1.461785  | 0.000000  |
| 7             | 6             | 0           | 1.180975        | 0.941813  | -1.265071 |
| 8             | 1             | 0           | 2.219002        | 1.279592  | -1.331777 |
| 9             | 1             | 0           | 0.657437        | 1.326750  | -2.139257 |
| 10            | 6             | 0           | 1.888222        | -1.120547 | 0.000000  |
| 11            | 1             | 0           | 1.907574        | -2.211581 | 0.000000  |
| 12            | 1             | 0           | 2.927423        | -0.790450 | 0.000000  |
| 13            | 6             | 0           | 1.180975        | -0.601707 | -1.255840 |
| 14            | 1             | 0           | 1.686821        | -0.967189 | -2.148258 |
| 15            | 6             | 0           | -0.275183       | -1.113816 | -1.290799 |
| 16            | 1             | 0           | -0.819989       | -0.708979 | -2.141790 |
| 17            | 1             | 0           | -0.255759       | -2.203482 | -1.405002 |
| 18            | 6             | 0           | -0.275183       | -1.113816 | 1.290799  |
| 19            | 1             | 0           | -0.819989       | -0.708979 | 2.141790  |
| 20            | 1             | 0           | -0.255759       | -2.203482 | 1.405002  |
| 21            | 6             | 0           | -0.483620       | 2.299272  | 0.000000  |
| 22            | 1             | 0           | -0.917195       | 2.659243  | 0.923322  |
| 23            | 1             | 0           | -0.917195       | 2.659243  | -0.923322 |
| 24            | 6             | 0           | -0.970729       | -0.800556 | 0.000000  |
| 25            | 6             | 0           | -2.251729       | -0.368199 | 0.000000  |
| 26            | 7             | 0           | -3.323179       | 0.125642  | 0.000000  |
| 27            | 1             | 0           | -4.282026       | -0.195329 | 0.000000  |

Sum of electronic and zero-point Energies= -482.625631

Sum of electronic and thermal Energies= -482.615178

Sum of electronic and thermal Enthalpies= -482.614234

Sum of electronic and thermal Free Energies= -482.661470

**Table S9.** Cartesian coordinates (Å) and energies (Hartree) of **TS(I)** (B3LYP-D3BJ/cc-pVTZ)

| Center Number | Atomic Number | Atomic Type | Coordinates (Å) |           |           |
|---------------|---------------|-------------|-----------------|-----------|-----------|
|               |               |             | X               | Y         | Z         |
| 1             | 6             | 0           | -1.441091       | -1.255232 | -0.939340 |
| 2             | 1             | 0           | -2.515181       | -1.255730 | -1.117240 |
| 3             | 1             | 0           | -1.006582       | -2.140763 | -1.400233 |
| 4             | 6             | 0           | -1.169831       | -1.257864 | 0.602615  |
| 5             | 1             | 0           | -1.610426       | -2.155830 | 1.033395  |
| 6             | 6             | 0           | -0.798700       | 0.000704  | -1.402144 |
| 7             | 1             | 0           | 4.398822        | 0.000036  | 0.305163  |
| 8             | 6             | 0           | -1.441344       | 1.256037  | -0.938020 |
| 9             | 1             | 0           | -2.515471       | 1.256382  | -1.115716 |
| 10            | 1             | 0           | -1.007189       | 2.142129  | -1.398155 |
| 11            | 6             | 0           | -1.788118       | -0.000661 | 1.227510  |
| 12            | 1             | 0           | -1.623645       | -0.001234 | 2.306321  |
| 13            | 1             | 0           | -2.867404       | -0.000605 | 1.074391  |
| 14            | 6             | 0           | -1.169909       | 1.257209  | 0.603903  |
| 15            | 1             | 0           | -1.610511       | 2.154734  | 1.035597  |
| 16            | 6             | 0           | 0.344386        | 1.286060  | 0.854875  |
| 17            | 1             | 0           | 0.802621        | 2.160373  | 0.393224  |
| 18            | 1             | 0           | 0.530312        | 1.351626  | 1.927917  |
| 19            | 6             | 0           | 0.344448        | -1.286886 | 0.853647  |
| 20            | 1             | 0           | 0.802759        | -2.160767 | 0.391251  |
| 21            | 1             | 0           | 0.530306        | -1.353434 | 1.926647  |
| 22            | 6             | 0           | 0.593888        | 0.000969  | -1.569137 |
| 23            | 1             | 0           | 1.076422        | -0.909079 | -1.903098 |
| 24            | 1             | 0           | 1.076119        | 0.911646  | -1.901838 |
| 25            | 6             | 0           | 0.999618        | -0.000192 | 0.331158  |
| 26            | 6             | 0           | 2.379822        | -0.000079 | 0.278457  |
| 27            | 7             | 0           | 3.488576        | 0.000017  | -0.139824 |

Sum of electronic and zero-point Energies= -482.610801

Sum of electronic and thermal Energies= -482.60149

Sum of electronic and thermal Enthalpies= -482.600546

Sum of electronic and thermal Free Energies= -482.645108

**Table S10.** Cartesian coordinates (Å) and energies (Hartree) of **TS(II)** (B3LYP-D3BJ/cc-pVTZ)

| Center Number | Atomic Number | Atomic Type | Coordinates (Å) |           |           |
|---------------|---------------|-------------|-----------------|-----------|-----------|
|               |               |             | X               | Y         | Z         |
| 1             | 6             | 0           | 0.096766        | 1.202792  | -1.279779 |
| 2             | 1             | 0           | -0.197136       | 2.243423  | -1.466044 |
| 3             | 1             | 0           | 0.742079        | 0.923054  | -2.112689 |
| 4             | 6             | 0           | -1.196446       | 0.360970  | -1.248693 |
| 5             | 1             | 0           | -1.767212       | 0.588487  | -2.147821 |
| 6             | 6             | 0           | 0.876619        | 1.223352  | 0.000295  |
| 7             | 1             | 0           | 2.779736        | 1.459206  | 0.922918  |
| 8             | 6             | 0           | 0.097311        | 1.201455  | 1.280717  |
| 9             | 1             | 0           | -0.196314       | 2.241979  | 1.468019  |
| 10            | 1             | 0           | 0.742904        | 0.920888  | 2.113129  |
| 11            | 6             | 0           | -2.009539       | 0.700954  | 0.000577  |
| 12            | 1             | 0           | -2.951987       | 0.152899  | 0.000551  |
| 13            | 1             | 0           | -2.260940       | 1.763081  | 0.001073  |
| 14            | 6             | 0           | -1.196029       | 0.359848  | 1.249261  |
| 15            | 1             | 0           | -1.766537       | 0.586572  | 2.148754  |
| 16            | 6             | 0           | -0.908036       | -1.177943 | 1.278041  |
| 17            | 1             | 0           | -0.308469       | -1.446345 | 2.144540  |
| 18            | 1             | 0           | -1.862525       | -1.703535 | 1.341254  |
| 19            | 6             | 0           | -0.908378       | -1.176820 | -1.278994 |
| 20            | 1             | 0           | -0.309202       | -1.444544 | -2.145963 |
| 21            | 1             | 0           | -1.862963       | -1.702226 | -1.342153 |
| 22            | 6             | 0           | 2.249662        | 1.250382  | -0.000154 |
| 23            | 1             | 0           | 2.779030        | 1.459558  | -0.923501 |
| 24            | 1             | 0           | 2.438616        | -0.216148 | 0.000215  |
| 25            | 6             | 0           | -0.222873       | -1.515443 | -0.000717 |
| 26            | 6             | 0           | 1.128857        | -1.704204 | -0.000765 |
| 27            | 7             | 0           | 2.279061        | -1.454058 | -0.000147 |

Sum of electronic and zero-point Energies= -482.601105

Sum of electronic and thermal Energies= -482.591635

Sum of electronic and thermal Enthalpies= -482.590691

Sum of electronic and thermal Free Energies= -482.635395

**Table S11.** Cartesian coordinates (Å) and energies (Hartree) of **TS(III)** (B3LYP-D3BJ/cc-pVTZ)

| Center Number | Atomic Number | Atomic Type | Coordinates (Å) |           |           |
|---------------|---------------|-------------|-----------------|-----------|-----------|
|               |               |             | X               | Y         | Z         |
| 1             | 6             | 0           | 1.291783        | 0.918959  | 1.275151  |
| 2             | 1             | 0           | 2.354006        | 1.155413  | 1.314052  |
| 3             | 1             | 0           | 0.811504        | 1.348807  | 2.153388  |
| 4             | 6             | 0           | 1.113659        | -0.623733 | 1.250930  |
| 5             | 1             | 0           | 1.594716        | -1.008480 | 2.148687  |
| 6             | 6             | 0           | 0.689212        | 1.450140  | -0.000747 |
| 7             | 1             | 0           | 0.626686        | 2.697238  | -0.001325 |
| 8             | 6             | 0           | 1.291370        | 0.917585  | -1.276264 |
| 9             | 1             | 0           | 2.353549        | 1.154150  | -1.315768 |
| 10            | 1             | 0           | 0.810754        | 1.346439  | -2.154804 |
| 11            | 6             | 0           | 1.784624        | -1.199155 | 0.000533  |
| 12            | 1             | 0           | 1.701617        | -2.286564 | 0.001124  |
| 13            | 1             | 0           | 2.849642        | -0.963678 | 0.000354  |
| 14            | 6             | 0           | 1.113498        | -0.625111 | -1.250408 |
| 15            | 1             | 0           | 1.594542        | -1.010723 | -2.147802 |
| 16            | 6             | 0           | -0.373997       | -1.037567 | -1.290804 |
| 17            | 1             | 0           | -0.893268       | -0.580239 | -2.132549 |
| 18            | 1             | 0           | -0.416240       | -2.120484 | -1.459389 |
| 19            | 6             | 0           | -0.373890       | -1.035900 | 1.291885  |
| 20            | 1             | 0           | -0.893074       | -0.577431 | 2.133066  |
| 21            | 1             | 0           | -0.416276       | -2.118591 | 1.461887  |
| 22            | 6             | 0           | -0.627814       | 1.907635  | -0.000716 |
| 23            | 1             | 0           | -1.130897       | 2.153497  | 0.927121  |
| 24            | 1             | 0           | -1.131424       | 2.152210  | -0.928604 |
| 25            | 6             | 0           | -1.082671       | -0.738287 | 0.000357  |
| 26            | 6             | 0           | -2.399983       | -0.307373 | 0.000177  |
| 27            | 7             | 0           | -3.481512       | 0.127897  | -0.000000 |

Sum of electronic and zero-point Energies= -482.571433

Sum of electronic and thermal Energies= -482.561451

Sum of electronic and thermal Enthalpies= -482.560507

Sum of electronic and thermal Free Energies= -482.606956

**Table S12.** Cartesian coordinates (Å) and energies (Hartree) of **TS(IV)** (B3LYP-D3BJ/cc-pVTZ)

| Center Number | Atomic Number | Atomic Type | Coordinates (Å) |           |           |
|---------------|---------------|-------------|-----------------|-----------|-----------|
|               |               |             | X               | Y         | Z         |
| 1             | 6             | 0           | -1.541761       | 1.395912  | -0.429967 |
| 2             | 1             | 0           | -2.626906       | 1.399214  | -0.410399 |
| 3             | 1             | 0           | -1.144452       | 2.330277  | -0.814180 |
| 4             | 6             | 0           | -1.048520       | 0.188979  | -1.407389 |
| 5             | 1             | 0           | -1.466996       | 0.434790  | -2.381235 |
| 6             | 6             | 0           | -0.918638       | 0.939850  | 0.792286  |
| 7             | 1             | 0           | -0.416241       | 4.372173  | 0.840347  |
| 8             | 6             | 0           | -1.527278       | -0.159522 | 1.507440  |
| 9             | 1             | 0           | -2.612495       | -0.147922 | 1.515775  |
| 10            | 1             | 0           | -1.119879       | -0.331814 | 2.498875  |
| 11            | 6             | 0           | -1.602362       | -1.121500 | -0.857443 |
| 12            | 1             | 0           | -1.316242       | -1.941654 | -1.518097 |
| 13            | 1             | 0           | -2.691637       | -1.103784 | -0.834861 |
| 14            | 6             | 0           | -1.033695       | -1.371263 | 0.535700  |
| 15            | 1             | 0           | -1.441327       | -2.272072 | 0.989898  |
| 16            | 6             | 0           | 0.491432        | -1.406230 | 0.524632  |
| 17            | 1             | 0           | 0.889885        | -1.577557 | 1.523703  |
| 18            | 1             | 0           | 0.835388        | -2.232814 | -0.097224 |
| 19            | 6             | 0           | 0.476275        | 0.182054  | -1.453116 |
| 20            | 1             | 0           | 0.863890        | 1.123706  | -1.839470 |
| 21            | 1             | 0           | 0.820048        | -0.600902 | -2.129153 |
| 22            | 6             | 0           | 0.523305        | 1.113400  | 0.920682  |
| 23            | 1             | 0           | 0.891148        | 2.055442  | 0.526123  |
| 24            | 1             | 0           | 0.903514        | 0.934247  | 1.921617  |
| 25            | 6             | 0           | 1.041661        | -0.085475 | -0.045609 |
| 26            | 6             | 0           | 2.494338        | -0.053694 | -0.031527 |
| 27            | 7             | 0           | 3.643393        | -0.025199 | -0.017977 |

Sum of electronic and zero-point Energies= -482.546835

Sum of electronic and thermal Energies= -482.536367

Sum of electronic and thermal Enthalpies= -482.535423

Sum of electronic and thermal Free Energies= -482.58259

**Table S13.** Cartesian coordinates (Å) and energies (Hartree) of **TS(V)** (B3LYP-D3BJ/cc-pVTZ)

| Center Number | Atomic Number | Atomic Type | Coordinates (Å) |           |           |
|---------------|---------------|-------------|-----------------|-----------|-----------|
|               |               |             | X               | Y         | Z         |
| 1             | 6             | 0           | 1.522077        | -1.308982 | 0.004887  |
| 2             | 1             | 0           | 2.488439        | -1.805533 | 0.006649  |
| 3             | 1             | 0           | -1.885437       | -3.528222 | 0.009038  |
| 4             | 6             | 0           | 0.967218        | -0.859313 | -1.236579 |
| 5             | 1             | 0           | 1.364094        | -1.381845 | -2.103010 |
| 6             | 6             | 0           | 0.967676        | -0.849471 | 1.243052  |
| 7             | 1             | 0           | 1.364669        | -1.365533 | 2.113307  |
| 8             | 6             | 0           | 1.646278        | 0.644090  | 1.230447  |
| 9             | 1             | 0           | 2.731476        | 0.572164  | 1.258452  |
| 10            | 1             | 0           | 1.308041        | 1.077055  | 2.170926  |
| 11            | 6             | 0           | 1.646044        | 0.634436  | -1.235434 |
| 12            | 1             | 0           | 1.307571        | 1.059956  | -2.179220 |
| 13            | 1             | 0           | 2.731224        | 0.562214  | -1.263123 |
| 14            | 6             | 0           | 1.148118        | 1.374239  | -0.005332 |
| 15            | 1             | 0           | 1.586891        | 2.376098  | -0.009312 |
| 16            | 6             | 0           | -0.380888       | 1.490786  | -0.005627 |
| 17            | 1             | 0           | -0.717816       | 2.046571  | 0.868428  |
| 18            | 1             | 0           | -0.718023       | 2.039851  | -0.883839 |
| 19            | 6             | 0           | -0.555804       | -0.695684 | -1.253270 |
| 20            | 1             | 0           | -1.027086       | -1.677479 | -1.283833 |
| 21            | 1             | 0           | -0.853525       | -0.166541 | -2.156688 |
| 22            | 6             | 0           | -0.555412       | -0.686089 | 1.258758  |
| 23            | 1             | 0           | -1.026462       | -1.667729 | 1.296800  |
| 24            | 1             | 0           | -0.853120       | -0.150227 | 2.158212  |
| 25            | 6             | 0           | -1.015692       | 0.079998  | -0.000127 |
| 26            | 6             | 0           | -2.470543       | 0.189889  | -0.000375 |
| 27            | 7             | 0           | -3.616482       | 0.275114  | -0.000741 |

Sum of electronic and zero-point Energies= -482.532394

Sum of electronic and thermal Energies= -482.52176

Sum of electronic and thermal Enthalpies= -482.520816

Sum of electronic and thermal Free Energies= -482.568288

**Table S14.** Cartesian coordinates (Å) and energies (Hartree) of **TS(VI)** (B3LYP-D3BJ/cc-pVTZ)

| Center Number | Atomic Number | Atomic Type | Coordinates (Å) |           |           |
|---------------|---------------|-------------|-----------------|-----------|-----------|
|               |               |             | X               | Y         | Z         |
| 1             | 6             | 0           | -1.614368       | -1.389682 | 0.377069  |
| 2             | 1             | 0           | -2.694276       | -1.308249 | 0.492314  |
| 3             | 1             | 0           | -1.317113       | -2.402915 | 0.639473  |
| 4             | 6             | 0           | -1.014087       | -0.330418 | 1.454470  |
| 5             | 1             | 0           | -1.334889       | -0.655421 | 2.441058  |
| 6             | 6             | 0           | -1.115321       | -0.980652 | -0.998462 |
| 7             | 1             | 0           | -1.503162       | -1.695366 | -1.731027 |
| 8             | 6             | 0           | -1.577156       | 0.437510  | -1.359133 |
| 9             | 1             | 0           | -2.666168       | 0.478635  | -1.369131 |
| 10            | 1             | 0           | -1.238726       | 0.695375  | -2.362841 |
| 11            | 6             | 0           | -1.516511       | 1.076791  | 1.066390  |
| 12            | 1             | 0           | -1.165113       | 1.796527  | 1.805288  |
| 13            | 1             | 0           | -2.604855       | 1.078594  | 1.107332  |
| 14            | 6             | 0           | -1.019391       | 1.434330  | -0.335345 |
| 15            | 1             | 0           | -1.350056       | 2.441301  | -0.589473 |
| 16            | 6             | 0           | 0.510041        | 1.411649  | -0.358934 |
| 17            | 1             | 0           | 0.898613        | 1.628476  | -1.352449 |
| 18            | 1             | 0           | 0.933244        | 2.146318  | 0.324687  |
| 19            | 6             | 0           | 0.394579        | -0.520365 | 1.255487  |
| 20            | 1             | 0           | 0.953870        | -1.200823 | 1.890670  |
| 21            | 1             | 0           | 4.609529        | 1.274044  | 0.600457  |
| 22            | 6             | 0           | 0.396654        | -1.087327 | -1.024023 |
| 23            | 1             | 0           | 0.758848        | -2.082719 | -0.777613 |
| 24            | 1             | 0           | 0.850470        | -0.776432 | -1.963488 |
| 25            | 6             | 0           | 1.020827        | 0.003725  | 0.063434  |
| 26            | 6             | 0           | 2.462471        | -0.108863 | 0.024542  |
| 27            | 7             | 0           | 3.614764        | -0.156791 | -0.021176 |

Sum of electronic and zero-point Energies= -482.520674

Sum of electronic and thermal Energies= -482.510011

Sum of electronic and thermal Enthalpies= -482.509067

Sum of electronic and thermal Free Energies= -482.556886



**Table S15.** Cartesian coordinates (Å) and energies (Hartree) of **CC(I)N<sub>2</sub>(1)** (B3LYP-D3BJ/cc-pVTZ)

| Center Number | Atomic Number | Atomic Type | Coordinates (Å) |           |           |
|---------------|---------------|-------------|-----------------|-----------|-----------|
|               |               |             | X               | Y         | Z         |
| 1             | 6             | 0           | 1.276270        | -1.941653 | 1.259860  |
| 2             | 1             | 0           | 1.282006        | -3.028747 | 1.268363  |
| 3             | 1             | 0           | 1.757640        | -1.575372 | 2.164513  |
| 4             | 6             | 0           | -0.236432       | -1.428559 | 1.251953  |
| 5             | 1             | 0           | -0.681895       | -1.823829 | 2.166197  |
| 6             | 6             | 0           | 1.894327        | -1.376131 | 0.000000  |
| 7             | 1             | 0           | 2.958629        | -1.724477 | 0.000000  |
| 8             | 6             | 0           | 1.276270        | -1.941653 | -1.259860 |
| 9             | 1             | 0           | 1.282006        | -3.028747 | -1.268363 |
| 10            | 1             | 0           | 1.757640        | -1.575372 | -2.164513 |
| 11            | 6             | 0           | -0.897124       | -1.987585 | 0.000000  |
| 12            | 1             | 0           | -1.955259       | -1.696158 | 0.000000  |
| 13            | 1             | 0           | -0.876479       | -3.076475 | 0.000000  |
| 14            | 6             | 0           | -0.236432       | -1.428559 | -1.251953 |
| 15            | 1             | 0           | -0.681895       | -1.823829 | -2.166197 |
| 16            | 6             | 0           | -0.236432       | 0.085307  | -1.273447 |
| 17            | 1             | 0           | 0.259056        | 0.472784  | -2.163394 |
| 18            | 1             | 0           | -1.264655       | 0.459807  | -1.309536 |
| 19            | 6             | 0           | -0.236432       | 0.085307  | 1.273447  |
| 20            | 1             | 0           | 0.259056        | 0.472784  | 2.163394  |
| 21            | 1             | 0           | -1.264655       | 0.459807  | 1.309536  |
| 22            | 6             | 0           | 1.957019        | 0.127840  | 0.000000  |
| 23            | 1             | 0           | 2.438175        | 0.531968  | 0.887077  |
| 24            | 1             | 0           | 2.438175        | 0.531968  | -0.887077 |
| 25            | 6             | 0           | 0.416388        | 0.648721  | 0.000000  |
| 26            | 6             | 0           | 0.457873        | 2.091891  | 0.000000  |
| 27            | 7             | 0           | 0.507160        | 3.243801  | 0.000000  |
| 28            | 7             | 0           | -3.450703       | 3.022863  | 0.000000  |
| 29            | 7             | 0           | -2.816359       | 2.135383  | 0.000000  |

Sum of electronic and zero-point Energies= -592.171448

Sum of electronic and thermal Energies= -592.157711

Sum of electronic and thermal Enthalpies= -592.156767

Sum of electronic and thermal Free Energies= -592.213900

**Table S16.** Cartesian coordinates (Å) and energies (Hartree) of **CC(I)N<sub>2</sub>(5)** (B3LYP-D3BJ/cc-pVTZ)

| Center Number | Atomic Number | Atomic Type | Coordinates (Å) |           |           |
|---------------|---------------|-------------|-----------------|-----------|-----------|
|               |               |             | X               | Y         | Z         |
| 1             | 6             | 0           | 1.143387        | 0.463550  | 1.259177  |
| 2             | 1             | 0           | 2.170852        | 0.818330  | 1.267396  |
| 3             | 1             | 0           | 0.640871        | 0.799037  | 2.164210  |
| 4             | 6             | 0           | 1.143387        | -1.137368 | 1.251560  |
| 5             | 1             | 0           | 1.661779        | -1.429034 | 2.166232  |
| 6             | 6             | 0           | 0.409005        | 0.859006  | 0.000000  |
| 7             | 1             | 0           | 0.403085        | 1.983682  | 0.000000  |
| 8             | 6             | 0           | 1.143387        | 0.463550  | -1.259177 |
| 9             | 1             | 0           | 2.170852        | 0.818330  | -1.267396 |
| 10            | 1             | 0           | 0.640871        | 0.799037  | -2.164210 |
| 11            | 6             | 0           | 1.885811        | -1.580285 | 0.000000  |
| 12            | 1             | 0           | 1.952939        | -2.676104 | 0.000000  |
| 13            | 1             | 0           | 2.910079        | -1.209899 | 0.000000  |
| 14            | 6             | 0           | 1.143387        | -1.137368 | -1.251560 |
| 15            | 1             | 0           | 1.661779        | -1.429034 | -2.166232 |
| 16            | 6             | 0           | -0.291446       | -1.624965 | -1.272700 |
| 17            | 1             | 0           | -0.816435       | -1.277399 | -2.162070 |
| 18            | 1             | 0           | -0.312557       | -2.718413 | -1.316882 |
| 19            | 6             | 0           | -0.291446       | -1.624965 | 1.272700  |
| 20            | 1             | 0           | -0.816435       | -1.277399 | 2.162070  |
| 21            | 1             | 0           | -0.312557       | -2.718413 | 1.316882  |
| 22            | 6             | 0           | -1.034700       | 0.436094  | 0.000000  |
| 23            | 1             | 0           | -1.570359       | 0.767120  | 0.886282  |
| 24            | 1             | 0           | -1.570359       | 0.767120  | -0.886282 |
| 25            | 6             | 0           | -1.034846       | -1.181605 | 0.000000  |
| 26            | 6             | 0           | -2.416047       | -1.609562 | 0.000000  |
| 27            | 7             | 0           | -3.522099       | -1.932942 | 0.000000  |
| 28            | 7             | 0           | 0.370008        | 4.280193  | 0.000000  |
| 29            | 7             | 0           | 0.350139        | 5.370826  | 0.000000  |

Sum of electronic and zero-point Energies= -592.170582

Sum of electronic and thermal Energies= -592.156785

Sum of electronic and thermal Enthalpies= -592.155840

Sum of electronic and thermal Free Energies= -592.214777

**Table S17.** Cartesian coordinates (Å) and energies (Hartree) of **CC(II)N<sub>2</sub>(1)** (B3LYP-D3BJ/cc-pVTZ)

| Center Number | Atomic Number | Atomic Type | Coordinates (Å) |           |           |
|---------------|---------------|-------------|-----------------|-----------|-----------|
|               |               |             | X               | Y         | Z         |
| 1             | 6             | 0           | -0.683570       | 2.551703  | 1.254411  |
| 2             | 1             | 0           | -0.687520       | 3.641097  | 1.262848  |
| 3             | 1             | 0           | -1.205990       | 2.203707  | 2.146702  |
| 4             | 6             | 0           | 0.786331        | 2.036443  | 1.258601  |
| 5             | 1             | 0           | 1.297398        | 2.387083  | 2.155254  |
| 6             | 6             | 0           | -1.284860       | 2.007475  | 0.000000  |
| 7             | 6             | 0           | -0.683570       | 2.551703  | -1.254411 |
| 8             | 1             | 0           | -0.687520       | 3.641097  | -1.262848 |
| 9             | 1             | 0           | -1.205990       | 2.203707  | -2.146702 |
| 10            | 6             | 0           | 1.506397        | 2.541705  | 0.000000  |
| 11            | 1             | 0           | 2.544428        | 2.202823  | 0.000000  |
| 12            | 1             | 0           | 1.529943        | 3.631646  | 0.000000  |
| 13            | 6             | 0           | 0.786331        | 2.036443  | -1.258601 |
| 14            | 1             | 0           | 1.297398        | 2.387083  | -2.155254 |
| 15            | 6             | 0           | 0.786331        | 0.500828  | -1.280367 |
| 16            | 1             | 0           | 0.276094        | 0.127983  | -2.168831 |
| 17            | 1             | 0           | 1.808490        | 0.122696  | -1.296015 |
| 18            | 6             | 0           | 0.786331        | 0.500828  | 1.280367  |
| 19            | 1             | 0           | 0.276094        | 0.127983  | 2.168831  |
| 20            | 1             | 0           | 1.808490        | 0.122696  | 1.296015  |
| 21            | 6             | 0           | -1.446817       | 0.531726  | 0.000000  |
| 22            | 1             | 0           | -1.955636       | 0.162261  | 0.888809  |
| 23            | 1             | 0           | -1.955636       | 0.162261  | -0.888809 |
| 24            | 6             | 0           | 0.062316        | -0.016407 | -0.000000 |
| 25            | 6             | 0           | 0.010145        | -1.438796 | -0.000000 |
| 26            | 7             | 0           | -0.113330       | -2.578878 | -0.000000 |
| 27            | 1             | 0           | -0.201675       | -3.595432 | -0.000000 |
| 28            | 7             | 0           | -0.470443       | -6.564037 | -0.000000 |
| 29            | 7             | 0           | -0.372022       | -5.478597 | -0.000000 |

Sum of electronic and zero-point Energies= -592.185849

Sum of electronic and thermal Energies= -592.172873

Sum of electronic and thermal Enthalpies= -592.171929

Sum of electronic and thermal Free Energies= -592.227364

**Table S18.** Cartesian coordinates (Å) and energies (Hartree) of **OC(I)N<sub>2</sub>(1)** (B3LYP-D3BJ/cc-pVTZ)

| Center Number | Atomic Number | Atomic Type | Coordinates (Å) |           |           |
|---------------|---------------|-------------|-----------------|-----------|-----------|
|               |               |             | X               | Y         | Z         |
| 1             | 6             | 0           | 0.310448        | -1.705436 | -0.044763 |
| 2             | 1             | 0           | 0.876172        | -2.623597 | 0.162014  |
| 3             | 1             | 0           | -0.729265       | -1.985718 | -0.193689 |
| 4             | 6             | 0           | 0.915752        | -1.047843 | -1.309967 |
| 5             | 1             | 0           | 0.868218        | -1.758052 | -2.132875 |
| 6             | 6             | 0           | 0.471244        | -0.832940 | 1.135858  |
| 7             | 1             | 0           | -0.475817       | -1.554208 | 2.819255  |
| 8             | 6             | 0           | 1.819671        | -0.290626 | 1.399765  |
| 9             | 1             | 0           | 2.455102        | -1.143151 | 1.673709  |
| 10            | 1             | 0           | 1.816236        | 0.396499  | 2.243330  |
| 11            | 6             | 0           | 2.361701        | -0.623631 | -1.041420 |
| 12            | 1             | 0           | 2.782847        | -0.160391 | -1.934246 |
| 13            | 1             | 0           | 2.975135        | -1.498776 | -0.823854 |
| 14            | 6             | 0           | 2.417679        | 0.361810  | 0.128907  |
| 15            | 1             | 0           | 3.443844        | 0.659455  | 0.334415  |
| 16            | 6             | 0           | 1.572901        | 1.617878  | -0.187327 |
| 17            | 1             | 0           | 1.567040        | 2.315508  | 0.646891  |
| 18            | 1             | 0           | 2.012497        | 2.132018  | -1.047597 |
| 19            | 6             | 0           | 0.049051        | 0.187408  | -1.649203 |
| 20            | 1             | 0           | -0.990376       | -0.087328 | -1.805717 |
| 21            | 1             | 0           | 0.421662        | 0.636187  | -2.575176 |
| 22            | 6             | 0           | -0.599963       | -0.704176 | 2.126610  |
| 23            | 1             | 0           | -1.591534       | -0.801060 | 1.691625  |
| 24            | 1             | 0           | -0.519220       | 0.199027  | 2.727435  |
| 25            | 6             | 0           | 0.194732        | 1.175440  | -0.543250 |
| 26            | 6             | 0           | -0.917896       | 1.724965  | 0.080334  |
| 27            | 7             | 0           | -1.846337       | 2.134369  | 0.647064  |
| 28            | 7             | 0           | -3.304371       | -0.771208 | -0.412660 |
| 29            | 7             | 0           | -4.347072       | -0.492233 | -0.571374 |

Sum of electronic and zero-point Energies= -592.187103

Sum of electronic and thermal Energies= -592.172138

Sum of electronic and thermal Enthalpies= -592.171193

Sum of electronic and thermal Free Energies= -592.231737

**Table S19.** Cartesian coordinates (Å) and energies (Hartree) of **OC(II)N<sub>2</sub>(1)** (B3LYP-D3BJ/cc-pVTZ)

| Center Number | Atomic Number | Atomic Type | Coordinates (Å) |           |           |
|---------------|---------------|-------------|-----------------|-----------|-----------|
|               |               |             | X               | Y         | Z         |
| 1             | 6             | 0           | -0.254626       | 2.337590  | 1.265327  |
| 2             | 1             | 0           | -0.225381       | 3.428608  | 1.335308  |
| 3             | 1             | 0           | -0.792156       | 1.971665  | 2.139429  |
| 4             | 6             | 0           | 1.198326        | 1.820688  | 1.255774  |
| 5             | 1             | 0           | 1.712950        | 2.175154  | 2.147815  |
| 6             | 6             | 0           | -0.953678       | 1.942027  | 0.000000  |
| 7             | 6             | 0           | -0.254626       | 2.337590  | -1.265327 |
| 8             | 1             | 0           | -0.225381       | 3.428608  | -1.335308 |
| 9             | 1             | 0           | -0.792156       | 1.971665  | -2.139429 |
| 10            | 6             | 0           | 1.924400        | 2.313457  | 0.000000  |
| 11            | 1             | 0           | 2.959191        | 1.966819  | 0.000000  |
| 12            | 1             | 0           | 1.960007        | 3.403294  | 0.000000  |
| 13            | 6             | 0           | 1.198326        | 1.820688  | -1.255774 |
| 14            | 1             | 0           | 1.712950        | 2.175154  | -2.147815 |
| 15            | 6             | 0           | 1.198326        | 0.276693  | -1.291263 |
| 16            | 1             | 0           | 0.632081        | -0.101757 | -2.140561 |
| 17            | 1             | 0           | 2.232328        | -0.066481 | -1.410714 |
| 18            | 6             | 0           | 1.198326        | 0.276693  | 1.291263  |
| 19            | 1             | 0           | 0.632081        | -0.101757 | 2.140561  |
| 20            | 1             | 0           | 2.232328        | -0.066481 | 1.410714  |
| 21            | 6             | 0           | -2.102660       | 1.244129  | 0.000000  |
| 22            | 1             | 0           | -2.591417       | 0.962940  | 0.923291  |
| 23            | 1             | 0           | -2.591417       | 0.962940  | -0.923291 |
| 24            | 6             | 0           | 0.676921        | -0.277299 | 0.000000  |
| 25            | 6             | 0           | -0.158743       | -1.345896 | 0.000000  |
| 26            | 7             | 0           | -0.961394       | -2.200510 | 0.000000  |
| 27            | 1             | 0           | -1.085413       | -3.211463 | 0.000000  |
| 28            | 7             | 0           | -1.408290       | -5.175880 | 0.000000  |
| 29            | 7             | 0           | -1.600650       | -6.248906 | 0.000000  |

Sum of electronic and zero-point Energies= -592.195791

Sum of electronic and thermal Energies= -592.181571

Sum of electronic and thermal Enthalpies= -592.180627

Sum of electronic and thermal Free Energies= -592.239303

**Table S20.** Cartesian coordinates (Å) and energies (Hartree) of N<sub>2</sub> (B3LYP-D3BJ/cc-pVTZ)

| Center Number | Atomic Number | Atomic Type | Coordinates (Å) |          |           |
|---------------|---------------|-------------|-----------------|----------|-----------|
|               |               |             | X               | Y        | Z         |
| 1             | 7             | 0           | 0.000000        | 0.000000 | 0.545733  |
| 2             | 7             | 0           | 0.000000        | 0.000000 | -0.545733 |

Sum of electronic and zero-point Energies= -109.563602

Sum of electronic and thermal Energies= -109.561241

Sum of electronic and thermal Enthalpies= -109.560297

Sum of electronic and thermal Free Energies= -109.582027

**Table S21.** Vibrational frequencies (in  $\text{cm}^{-1}$ ) computed for AdCN and various AdCN<sup>+</sup> isomers (B3LYP-D3BJ/cc-pVTZ). Computed harmonic frequencies are scaled by 0.953. IR intensities in  $\text{km mol}^{-1}$  are listed in parentheses.

| Mode                                            | AdCN                                              | CC(I)                                                                              | CC(II)                                                                                            | OC(I)                                                                | OC(II)                                                        |
|-------------------------------------------------|---------------------------------------------------|------------------------------------------------------------------------------------|---------------------------------------------------------------------------------------------------|----------------------------------------------------------------------|---------------------------------------------------------------|
| $\nu_{\text{CN}}$                               | 2235 (21)                                         | 2193 (324)                                                                         | 2176 (703)                                                                                        | 2081 (31)                                                            | 2066 (703)                                                    |
| $\nu_{\text{CH}}, \nu_{\text{CH}_2^{\text{s}}}$ | 2876 (21)<br>2877 (13)<br>2892 (45)<br>2901 (107) | 2601* (246)<br>2829 (67)<br>2863 (28)                                              | 2896 (15)<br>2901 (13)<br>2903 (14)<br>2905 (9)<br>2906 (5)<br>2913 (11)<br>2924 (33)<br>2925 (9) | 2815* (40)<br>2850 (7)<br>2862 (6)<br>2907 (5)                       | 2889 (2)<br>2902 (11)                                         |
| $\nu_{\text{CH}}, \nu_{\text{CH}_2^{\text{a}}}$ | 2910 (13)<br>2914 (95)<br>2931 (45)               | 2896 (15)<br>2908 (7)<br>2932 (4)<br>2939 (8)<br>2940 (8)<br>2945 (8)<br>2986 (11) | 2936 (10)<br>2948 (7)<br>2949 (13)<br>2952 (13)<br>2952 (27)<br>2966 (11)                         | 2942 (5)<br>2948 (5)<br>2949 (6)<br>2957 (6)<br>2959 (5)<br>2966 (9) | 2934 (10)<br>2935 (15)<br>2937 (11)<br>2942 (16)<br>2950 (20) |
| $\nu_{\text{CC}}/\nu_{\text{CH}_2^{\text{s}}}$  |                                                   |                                                                                    |                                                                                                   |                                                                      | 2993 (8)                                                      |
| $\nu_{\text{CN}}$                               |                                                   |                                                                                    | 3555 (1333)                                                                                       |                                                                      | 3421 (545)                                                    |

\*Acidic CH stretching frequency

**Table S22.** AdCN

| Wavenumber / cm <sup>-1</sup> | IR Intensity / km mol <sup>-1</sup> |
|-------------------------------|-------------------------------------|
| 138.6381                      | 4.9583                              |
| 138.6388                      | 4.9584                              |
| 314.5305                      | 0.3451                              |
| 314.5307                      | 0.345                               |
| 386.9889                      | 0.0265                              |
| 407.777                       | 0.1762                              |
| 407.779                       | 0.176                               |
| 440.7672                      | 0.0692                              |
| 440.7678                      | 0.0693                              |
| 502.5922                      | 0.3603                              |
| 559.0053                      | 0.0454                              |
| 559.0059                      | 0.0454                              |
| 658.2757                      | 0.1111                              |
| 658.2758                      | 0.1111                              |
| 704.6405                      | 1.7425                              |
| 775.5785                      | 0.4344                              |
| 818.6847                      | 0.6425                              |
| 818.6868                      | 0.6427                              |
| 898.5685                      | 0.0161                              |
| 898.5693                      | 0.016                               |
| 909.1175                      | 0.0072                              |
| 942.8444                      | 0.184                               |
| 942.845                       | 0.184                               |
| 988.3505                      | 1.7007                              |
| 988.3512                      | 1.7007                              |
| 994.7283                      | 2.0824                              |
| 1047.9582                     | 0.0026                              |
| 1047.9589                     | 0.0026                              |
| 1118.6377                     | 3.7885                              |
| 1124.851                      | 2.6678                              |
| 1153.7733                     | 0.3513                              |
| 1211.4101                     | 0.2949                              |
| 1211.4106                     | 0.2944                              |
| 1285.3334                     | 0.0176                              |
| 1285.3343                     | 0.0177                              |
| 1317.038                      | 0.0567                              |
| 1317.0383                     | 0.0568                              |
| 1347.779                      | 3.3222                              |
| 1350.2357                     | 0.0328                              |
| 1350.2362                     | 0.0328                              |
| 1383.4048                     | 0.6957                              |
| 1383.4048                     | 0.6959                              |
| 1399.5821                     | 0.4071                              |
| 1401.3404                     | 0.0779                              |
| 1401.3442                     | 0.0775                              |
| 1486.3973                     | 0.0012                              |
| 1486.3973                     | 0.0012                              |
| 1498.9526                     | 11.1298                             |
| 1498.9527                     | 11.1307                             |
| 1500.3328                     | 14.2751                             |
| 1522.2511                     | 0.3027                              |
| 2345.6827                     | 21.3265                             |
| 3018.4006                     | 21.3495                             |
| 3018.4007                     | 21.3506                             |
| 3018.7157                     | 13.3127                             |
| 3032.1448                     | 0.1395                              |
| 3032.145                      | 0.1393                              |



|           |          |
|-----------|----------|
| 3035.8088 | 45.2565  |
| 3044.5571 | 107.129  |
| 3044.5575 | 107.1252 |
| 3052.001  | 7.9259   |
| 3053.1628 | 12.8766  |
| 3053.1628 | 12.8744  |
| 3058.3522 | 94.43    |
| 3076.211  | 45.2401  |
| 3076.211  | 45.2436  |

Table S23. CC(I)

| Wavenumber / cm <sup>-1</sup> | IR Intensity / km mol <sup>-1</sup> |
|-------------------------------|-------------------------------------|
| 127.863                       | 13.5446                             |
| 135.826                       | 4.9909                              |
| 276.7519                      | 78.7793                             |
| 299.2598                      | 47.8915                             |
| 311.7139                      | 76.9395                             |
| 330.7959                      | 2.5534                              |
| 361.5279                      | 80.9434                             |
| 407.959                       | 0.9275                              |
| 438.4488                      | 7.6168                              |
| 448.9667                      | 7.8261                              |
| 491.6683                      | 96.7699                             |
| 529.373                       | 4.8967                              |
| 545.4422                      | 132.574                             |
| 547.6861                      | 177.7328                            |
| 557.4164                      | 778.7614                            |
| 641.9001                      | 67.4839                             |
| 664.3452                      | 19.2934                             |
| 682.0949                      | 50.946                              |
| 701.9106                      | 138.1357                            |
| 768.1417                      | 85.1609                             |
| 799.7162                      | 14.5376                             |
| 844.3993                      | 25.327                              |
| 848.1226                      | 21.8587                             |
| 849.6106                      | 29.9496                             |
| 881.2296                      | 10.4908                             |
| 893.0156                      | 37.4815                             |
| 906.3342                      | 52.779                              |
| 912.2377                      | 0.03                                |
| 951.5972                      | 3.1309                              |
| 964.0641                      | 56.7286                             |
| 964.7999                      | 10.7905                             |
| 982.6538                      | 12.0407                             |
| 1028.0298                     | 29.6706                             |
| 1063.8309                     | 2.8378                              |
| 1083.3024                     | 17.0071                             |
| 1086.9957                     | 12.2799                             |
| 1098.2994                     | 42.7267                             |
| 1131.29                       | 294.7065                            |
| 1134.0377                     | 53.7998                             |
| 1142.7016                     | 11.6023                             |
| 1162.611                      | 33.1967                             |
| 1223.4937                     | 10.3295                             |
| 1252.6863                     | 0.6186                              |
| 1287.1413                     | 0.189                               |
| 1288.9177                     | 1.5128                              |
| 1306.8486                     | 6.6268                              |
| 1315.1502                     | 2.1679                              |
| 1332.7401                     | 0.8696                              |
| 1341.7029                     | 3.4692                              |
| 1363.634                      | 6.9841                              |
| 1377.2337                     | 2.5164                              |
| 1392.8326                     | 5.8216                              |
| 1433.6279                     | 9.415                               |
| 1440.8481                     | 22.6852                             |
| 1467.3476                     | 24.9422                             |
| 1492.5385                     | 2.8372                              |
| 1492.9171                     | 6.3995                              |

|           |          |
|-----------|----------|
| 1524.0561 | 4.3809   |
| 2301.4537 | 324.8384 |
| 2729.7849 | 246.1526 |
| 2968.2793 | 67.0633  |
| 3003.7601 | 27.6125  |
| 3020.418  | 3.3762   |
| 3038.3151 | 13.778   |
| 3051.8121 | 7.4486   |
| 3075.0518 | 1.5886   |
| 3075.6628 | 3.863    |
| 3078.2945 | 0.972    |
| 3083.4502 | 7.5316   |
| 3085.0221 | 7.612    |
| 3089.8974 | 7.9407   |
| 3129.5903 | 0.1666   |
| 3133.5693 | 11.0235  |
| 3134.8245 | 2.5064   |

Table S24. CC(II)

| Wavenumber / $\text{cm}^{-1}$ | IR Intensity / $\text{km mol}^{-1}$ |
|-------------------------------|-------------------------------------|
| 115.2382                      | 5.1356                              |
| 117.955                       | 3.4882                              |
| 302.9343                      | 0.3825                              |
| 312.2267                      | 4.7721                              |
| 324.911                       | 0.0093                              |
| 348.9279                      | 119.5626                            |
| 378.6292                      | 2.8147                              |
| 393.6239                      | 0.2768                              |
| 399.8431                      | 1.7605                              |
| 434.447                       | 1.4176                              |
| 446.0533                      | 0.0772                              |
| 505.0949                      | 0.2295                              |
| 511.5501                      | 125.6612                            |
| 550.8231                      | 34.2637                             |
| 579.7925                      | 1.019                               |
| 639.0056                      | 3.0834                              |
| 645.912                       | 1.6238                              |
| 649.1939                      | 33.2714                             |
| 757.131                       | 62.5237                             |
| 776.9972                      | 10.762                              |
| 811.9886                      | 0.0192                              |
| 831.0051                      | 11.364                              |
| 899.7344                      | 1.6119                              |
| 902.5104                      | 26.7556                             |
| 907.9729                      | 0.0434                              |
| 919.778                       | 3.1922                              |
| 926.8241                      | 4.7491                              |
| 952.6039                      | 0.2343                              |
| 979.9499                      | 13.1672                             |
| 985.7222                      | 4.9918                              |
| 1029.6061                     | 0.3654                              |
| 1039.8728                     | 4.513                               |
| 1051.1263                     | 0.0635                              |
| 1125.6153                     | 2.2442                              |
| 1132.2368                     | 5.3345                              |
| 1140.17                       | 0.1718                              |
| 1163.3227                     | 4.8489                              |
| 1183.8363                     | 0.7371                              |
| 1222.8905                     | 1.2967                              |
| 1224.3914                     | 11.1484                             |
| 1269.108                      | 8.1143                              |
| 1289.9485                     | 0.0007                              |
| 1299.7269                     | 9.4123                              |
| 1303.5685                     | 1.4025                              |
| 1309.0286                     | 0.6375                              |
| 1316.7148                     | 3.1434                              |
| 1341.5619                     | 2.9005                              |
| 1350.5752                     | 0.0129                              |
| 1369.18                       | 1.736                               |
| 1379.1303                     | 0.6963                              |
| 1382.1244                     | 2.1707                              |
| 1392.552                      | 4.6606                              |
| 1484.509                      | 0.2354                              |
| 1486.2785                     | 0.579                               |
| 1496.6891                     | 27.2486                             |
| 1498.1553                     | 13.6199                             |
| 1500.6767                     | 18.1798                             |

|           |           |
|-----------|-----------|
| 1521.485  | 2.1845    |
| 2283.3132 | 702.5285  |
| 3038.3221 | 14.6288   |
| 3043.9675 | 13.2147   |
| 3045.8023 | 13.7599   |
| 3048.1977 | 9.1234    |
| 3049.2301 | 5.247     |
| 3057.004  | 11.0596   |
| 3067.8706 | 32.7642   |
| 3069.5174 | 8.589     |
| 3081.0321 | 9.9541    |
| 3091.8915 | 1.0006    |
| 3093.8458 | 6.6518    |
| 3094.294  | 12.6175   |
| 3097.4787 | 27.4629   |
| 3112.0684 | 10.7639   |
| 3730.2954 | 1333.3094 |

Table S25. OC(I)

| Wavenumber / cm <sup>-1</sup> | IR Intensity / km mol <sup>-1</sup> |
|-------------------------------|-------------------------------------|
| 84.8674                       | 2.3076                              |
| 109.38                        | 4.505                               |
| 119.31                        | 0.2035                              |
| 138.1762                      | 6.4049                              |
| 209.2083                      | 2.3412                              |
| 262.7976                      | 7.4394                              |
| 338.9819                      | 2.4578                              |
| 349.9208                      | 0.1366                              |
| 375.3358                      | 0.0036                              |
| 396.7794                      | 5.9289                              |
| 397.1029                      | 0.0067                              |
| 416.1448                      | 0.0111                              |
| 475.0014                      | 1.4792                              |
| 508.4194                      | 5.3682                              |
| 573.5705                      | 18.0775                             |
| 580.7492                      | 0.0074                              |
| 634.5921                      | 3.5316                              |
| 706.1649                      | 2.9036                              |
| 769.8506                      | 3.5158                              |
| 803.9875                      | 7.997                               |
| 806.1281                      | 2.029                               |
| 839.302                       | 0.3076                              |
| 843.2342                      | 14.4297                             |
| 895.0847                      | 3.8699                              |
| 897.5445                      | 0.0202                              |
| 916.6219                      | 11.1022                             |
| 928.9839                      | 0.0254                              |
| 954.8734                      | 1.4323                              |
| 1003.831                      | 16.2626                             |
| 1009.7478                     | 0.6596                              |
| 1028.8683                     | 16.9026                             |
| 1049.0127                     | 2.0594                              |
| 1080.5986                     | 26.0226                             |
| 1138.5215                     | 3.4463                              |
| 1151.5377                     | 50.7898                             |
| 1160.2819                     | 5.2964                              |
| 1171.7206                     | 87.0477                             |
| 1210.7927                     | 15.9523                             |
| 1221.2743                     | 31.3636                             |
| 1262.6598                     | 0.1075                              |
| 1269.345                      | 7.3064                              |
| 1305.283                      | 16.0281                             |
| 1323.7999                     | 2.864                               |
| 1328.7397                     | 10.3487                             |
| 1338.2564                     | 39.0177                             |
| 1365.4239                     | 1.832                               |
| 1370.9102                     | 39.9934                             |
| 1380.179                      | 9.4255                              |
| 1382.746                      | 1.2356                              |
| 1399.4408                     | 7.4863                              |
| 1430.3304                     | 29.3102                             |
| 1438.0148                     | 0.3289                              |
| 1451.7452                     | 15.6042                             |
| 1473.3718                     | 20.0898                             |
| 1473.4844                     | 0.2162                              |
| 1485.4028                     | 5.9139                              |
| 1491.4512                     | 15.6907                             |

|           |         |
|-----------|---------|
| 1502.0095 | 8.0076  |
| 2183.1225 | 31.399  |
| 2954.0453 | 40.1887 |
| 2990.094  | 6.9014  |
| 3002.3208 | 5.7038  |
| 3022.1522 | 0.6863  |
| 3028.262  | 0.1585  |
| 3050.6973 | 5.3792  |
| 3083.8019 | 1.1304  |
| 3087.4474 | 5.3427  |
| 3093.8399 | 4.9086  |
| 3094.3421 | 5.6465  |
| 3102.8331 | 6.2342  |
| 3104.671  | 4.5861  |
| 3112.0971 | 8.9411  |
| 3112.5846 | 0.9952  |
| 3145.8972 | 0.0898  |

Table S26. OC(II)

| Wavenumber / cm <sup>-1</sup> | IR Intensity / km mol <sup>-1</sup> |
|-------------------------------|-------------------------------------|
| 83.4181                       | 2.8279                              |
| 108.6679                      | 0.1336                              |
| 119.697                       | 1.6646                              |
| 200.3678                      | 0.7033                              |
| 292.6726                      | 9.6764                              |
| 321.4998                      | 6.3756                              |
| 345.2053                      | 1.3363                              |
| 376.7801                      | 0.2184                              |
| 404.7048                      | 35.0667                             |
| 405.0441                      | 0.4024                              |
| 420.4223                      | 0.0002                              |
| 471.9553                      | 19.9632                             |
| 508.7636                      | 16.9691                             |
| 591.9708                      | 43.8164                             |
| 598.8136                      | 10.1606                             |
| 608.6977                      | 544.1453                            |
| 610.3694                      | 7.6412                              |
| 626.1091                      | 50.7406                             |
| 693.9118                      | 2.5411                              |
| 716.6079                      | 2.7166                              |
| 793.9246                      | 1.1651                              |
| 810.4408                      | 2.9153                              |
| 817.9987                      | 0.4285                              |
| 865.489                       | 0.0313                              |
| 895.3403                      | 1.4929                              |
| 920.9814                      | 5.0769                              |
| 922.2635                      | 0.1102                              |
| 944.4711                      | 6.1955                              |
| 945.6451                      | 0.2033                              |
| 973.0692                      | 16.8455                             |
| 990.7693                      | 0.2147                              |
| 1003.8897                     | 0.5156                              |
| 1057.2985                     | 19.6098                             |
| 1091.242                      | 2.5667                              |
| 1126.1199                     | 0.1327                              |
| 1143.9735                     | 2.8012                              |
| 1167.953                      | 0.0207                              |
| 1179.485                      | 2.3052                              |
| 1217.5379                     | 6.5494                              |
| 1231.7764                     | 7.176                               |
| 1256.6457                     | 0.566                               |
| 1258.2402                     | 57.6987                             |
| 1302.0506                     | 16.0266                             |
| 1310.2124                     | 0.6454                              |
| 1318.759                      | 0.0599                              |
| 1345.7172                     | 62.9156                             |
| 1361.4345                     | 0.0289                              |
| 1371.9461                     | 5.395                               |
| 1383.9573                     | 3.8815                              |
| 1388.4268                     | 0.0451                              |
| 1414.2758                     | 10.7576                             |
| 1457.5271                     | 7.9139                              |
| 1459.1926                     | 7.8095                              |
| 1473.0371                     | 14.4052                             |
| 1477.7573                     | 17.4157                             |
| 1491.2725                     | 22.3352                             |
| 1505.814                      | 3.9338                              |



|           |          |
|-----------|----------|
| 1626.7729 | 296.9044 |
| 2168.0125 | 703.1366 |
| 3002.9903 | 0.987    |
| 3007.7892 | 0.2843   |
| 3025.6712 | 0.6552   |
| 3031.0427 | 1.8111   |
| 3045.0821 | 10.8327  |
| 3079.2333 | 9.828    |
| 3080.0221 | 14.6901  |
| 3082.3277 | 10.6198  |
| 3087.4467 | 16.0278  |
| 3089.2257 | 2.944    |
| 3095.8897 | 19.3704  |
| 3096.0835 | 2.3799   |
| 3140.2982 | 8.0123   |
| 3230.5188 | 1.4727   |
| 3589.3648 | 544.6227 |

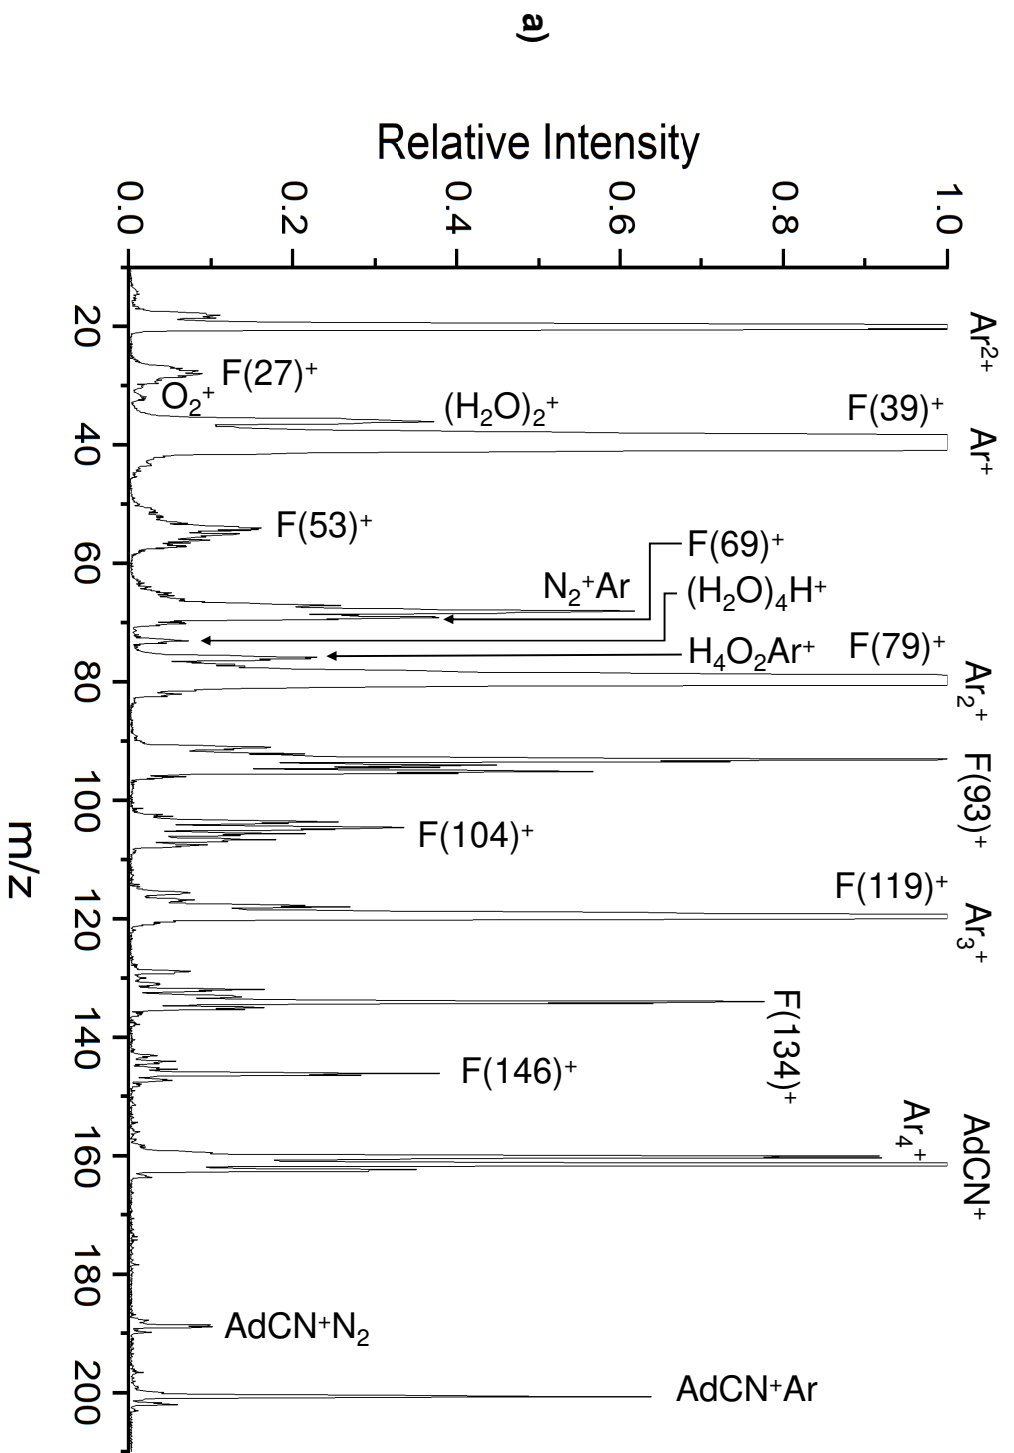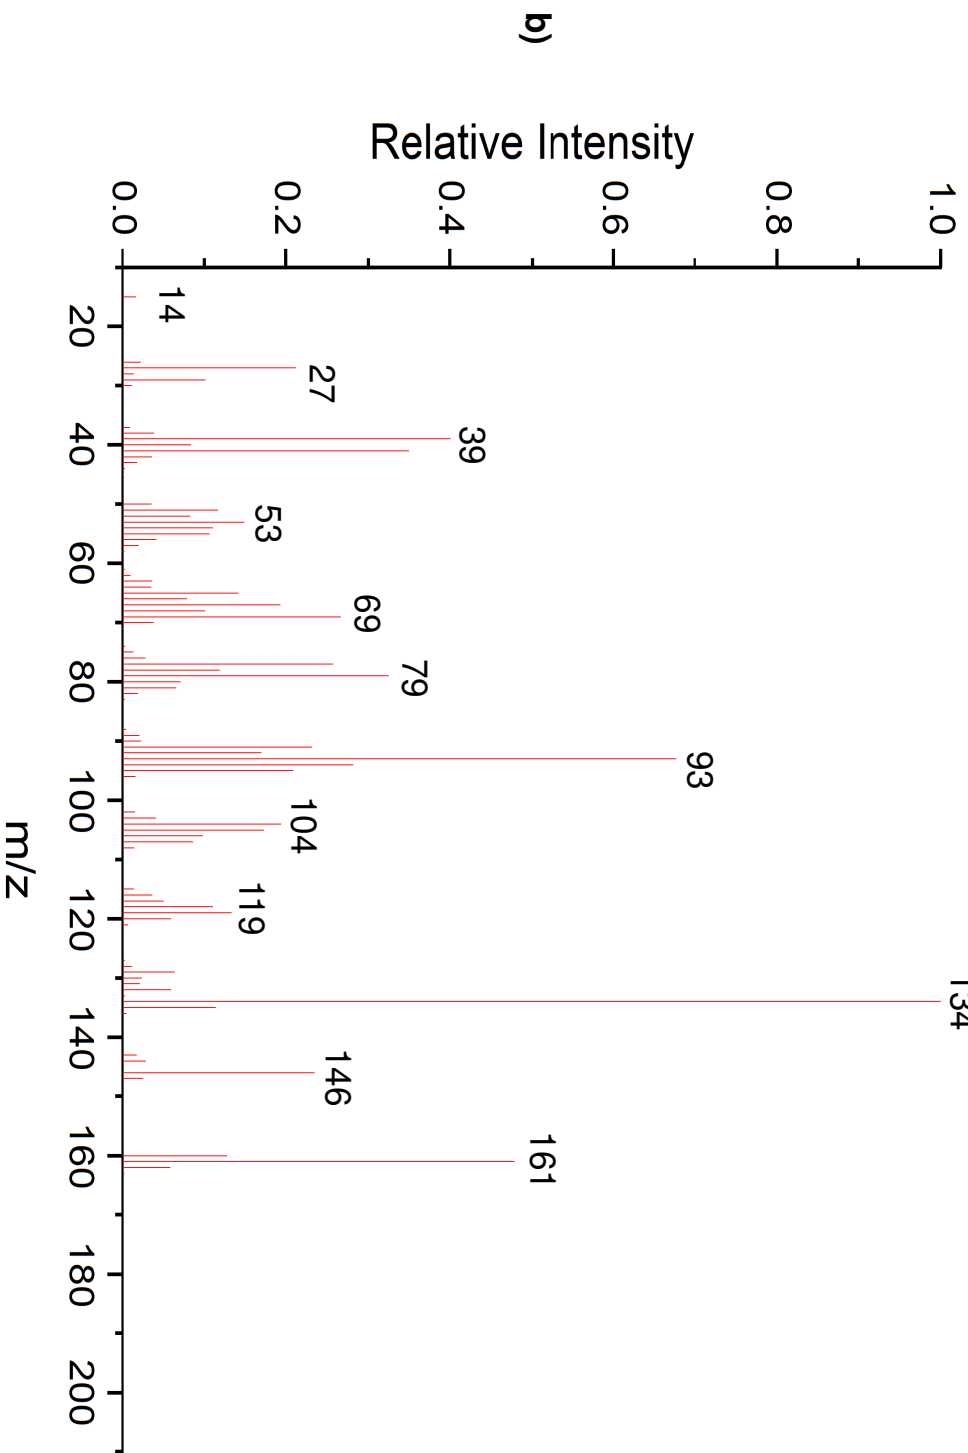

Figure S1

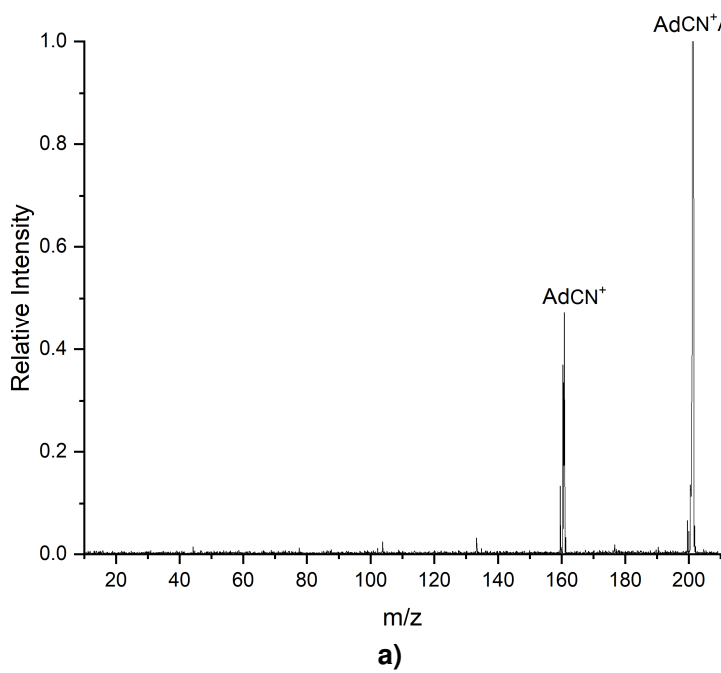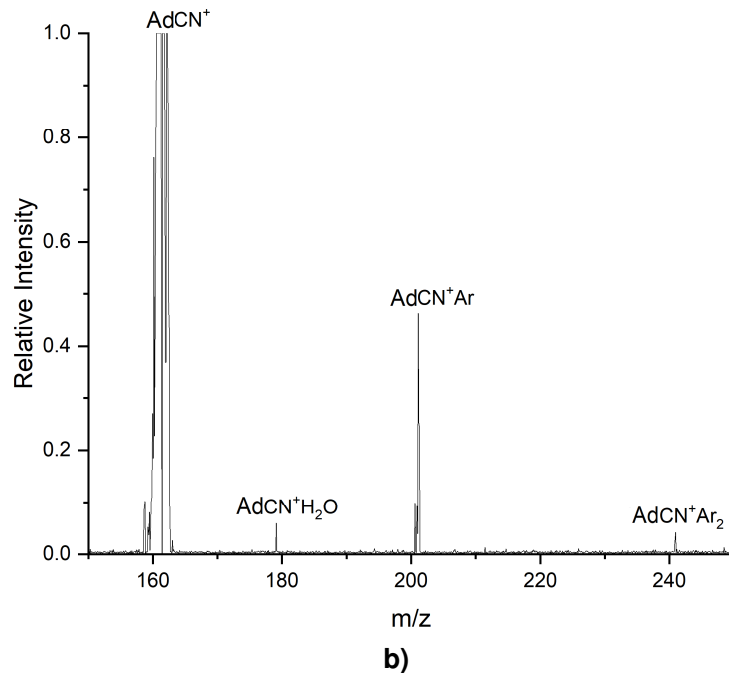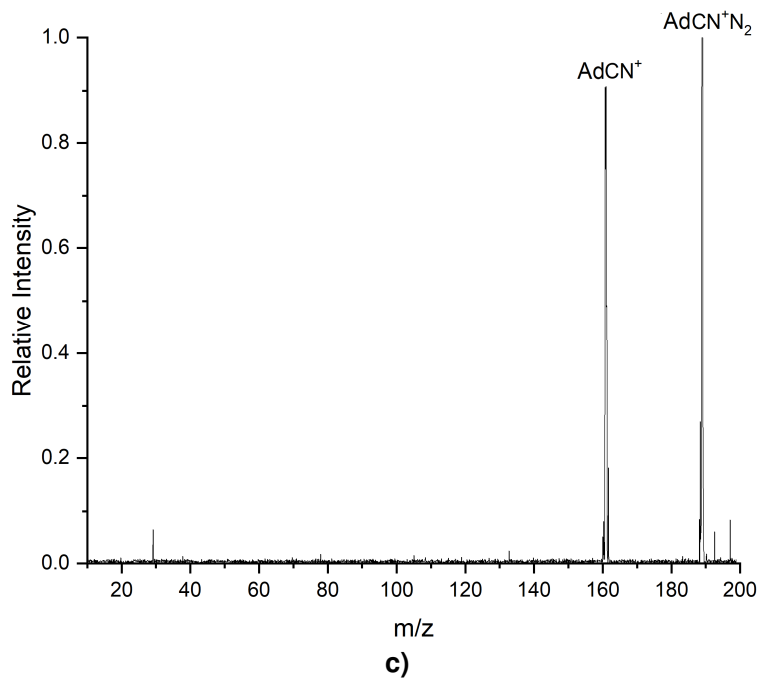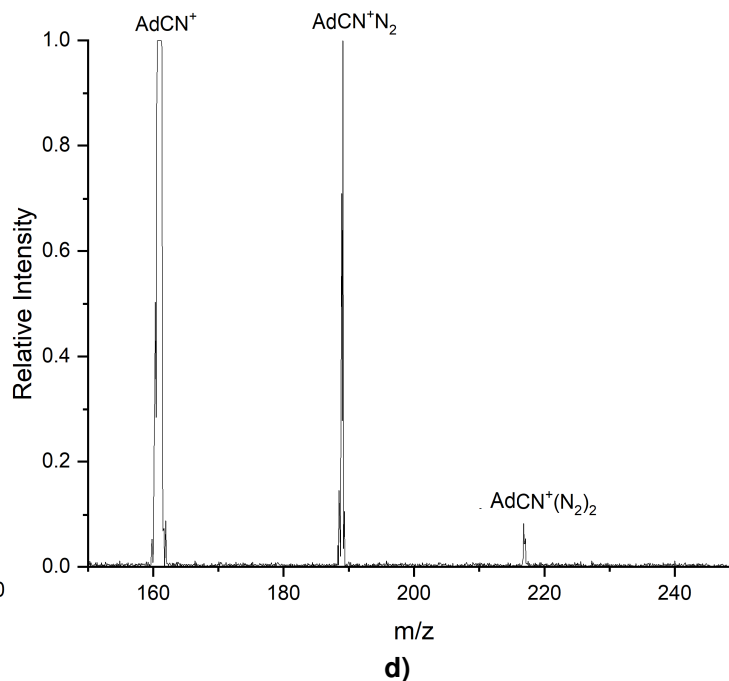

Figure S2

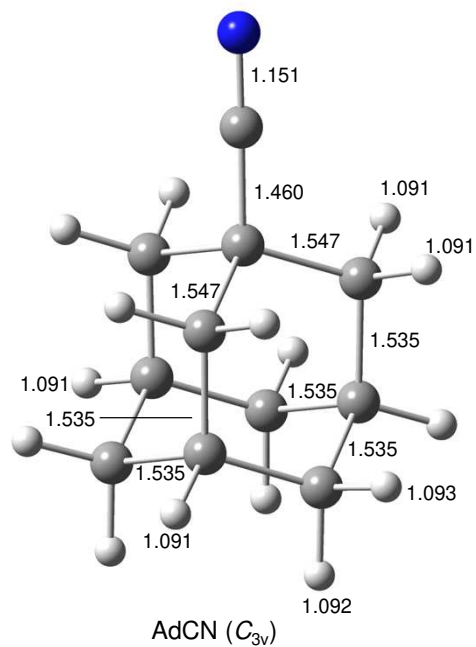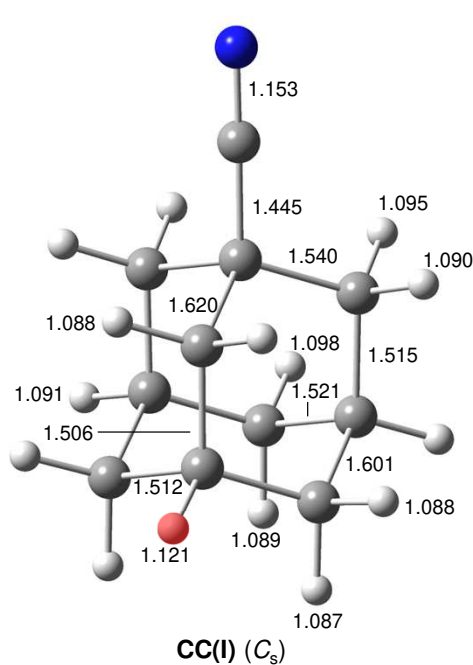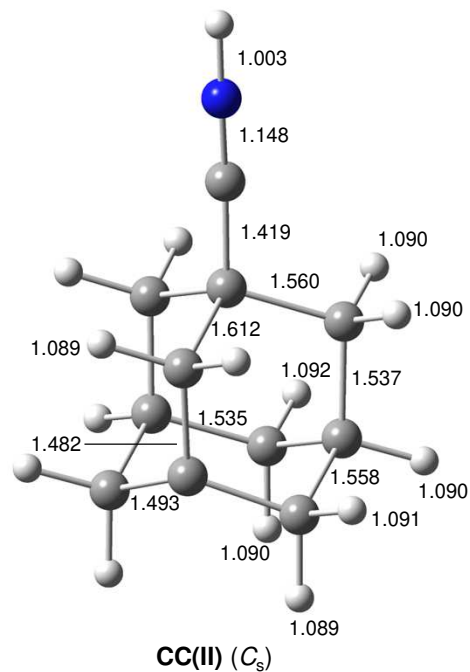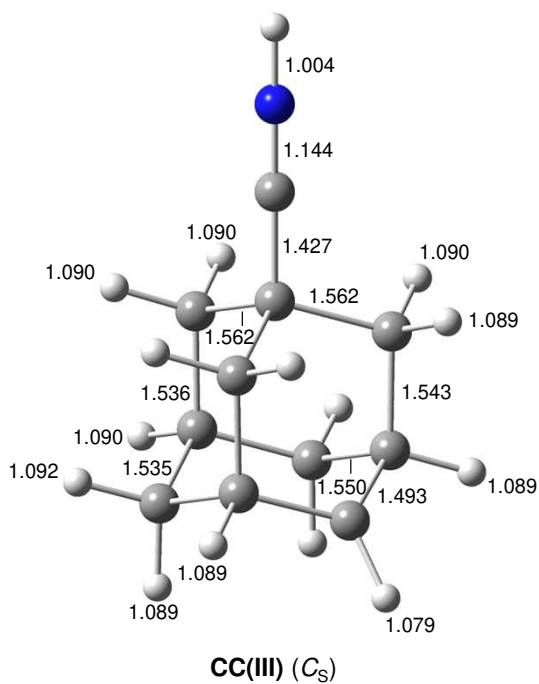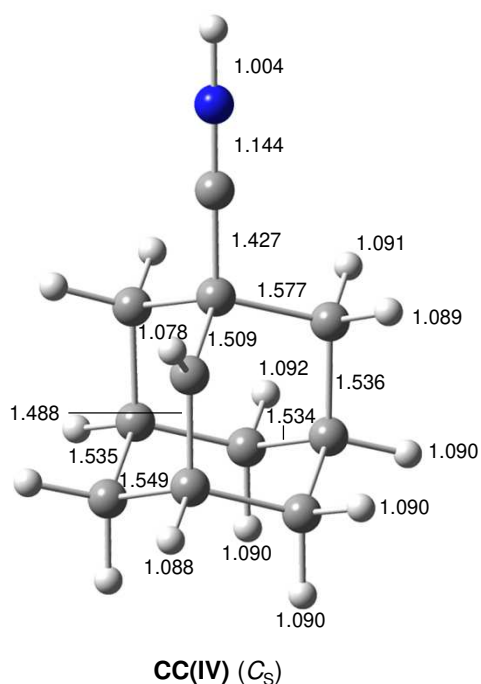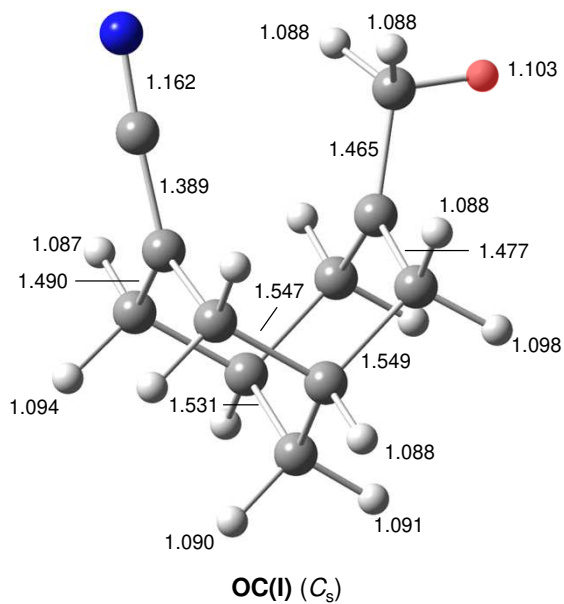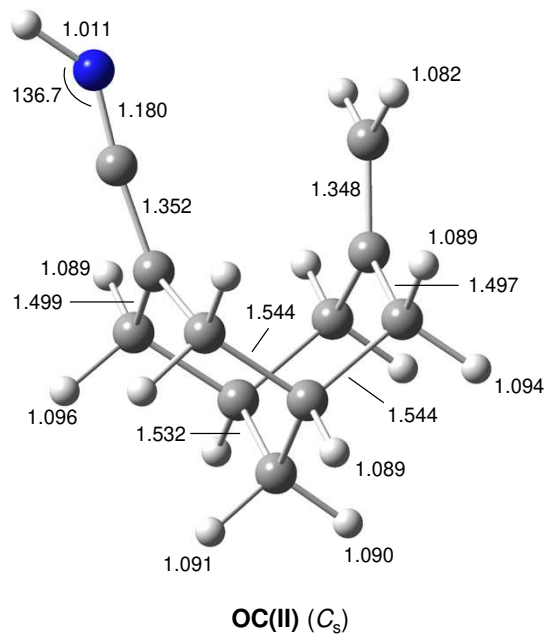

Figure S3

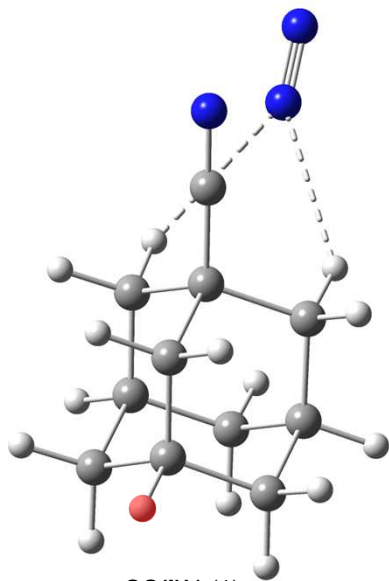

**CC(I)N<sub>2</sub>(1)**  
 $E_0=0.00$   
 $D_0=12.14$

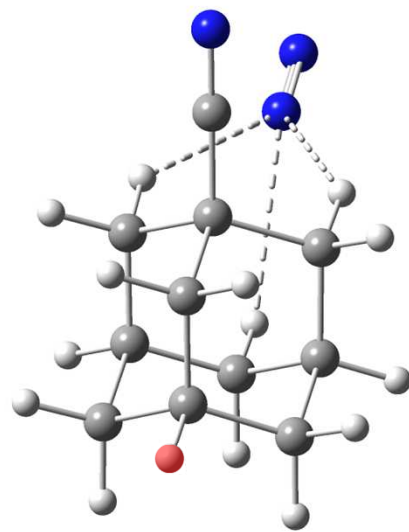

**CC(I)N<sub>2</sub>(2)**  
 $E_0=0.57$   
 $D_0=11.57$

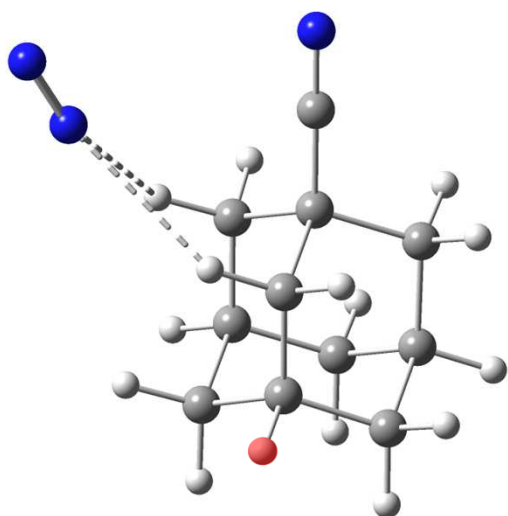

**CC(I)N<sub>2</sub>(3)**  
 $E_0=0.98$   
 $D_0=11.15$

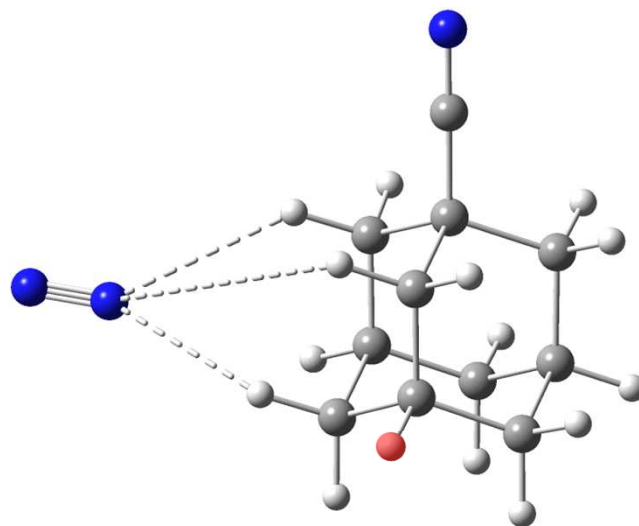

**CC(I)N<sub>2</sub>(4)**  
 $E_0=2.22$   
 $D_0=9.92$

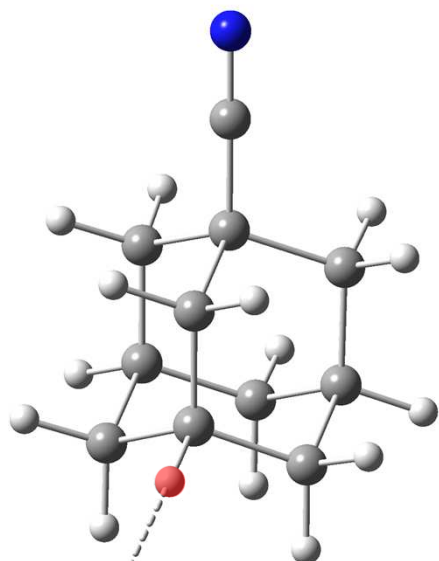

**CC(I)N<sub>2</sub>(5)**  
 $E_0=2.27$   
 $D_0=9.86$

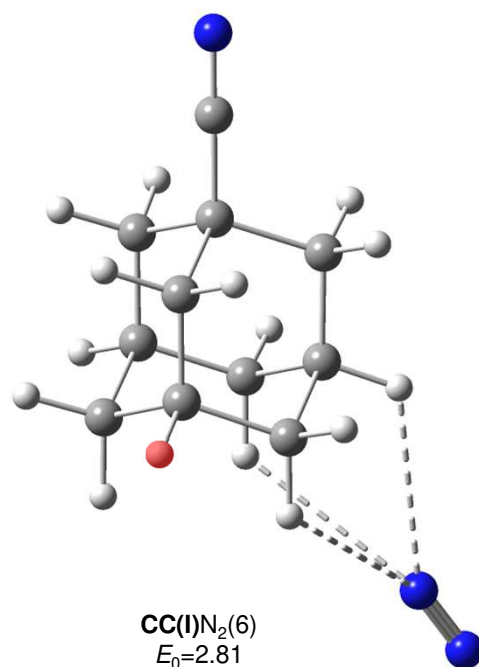

**CC(I)N<sub>2</sub>(6)**  
 $E_0=2.81$   
 $D_0=9.33$

Figure S4

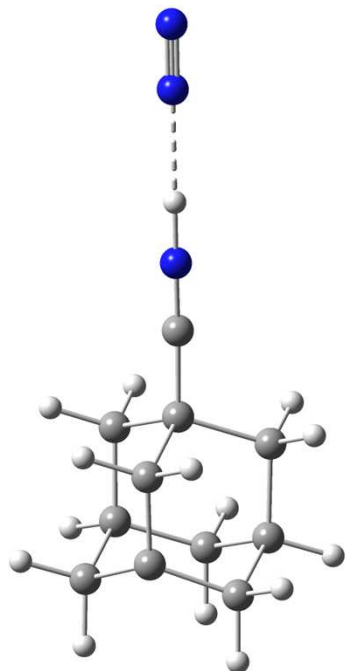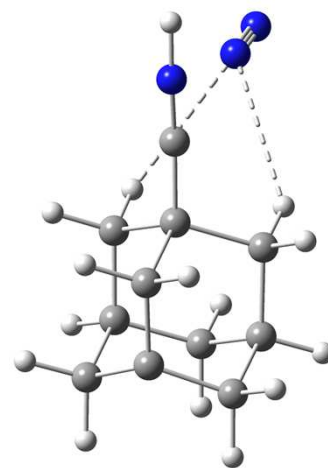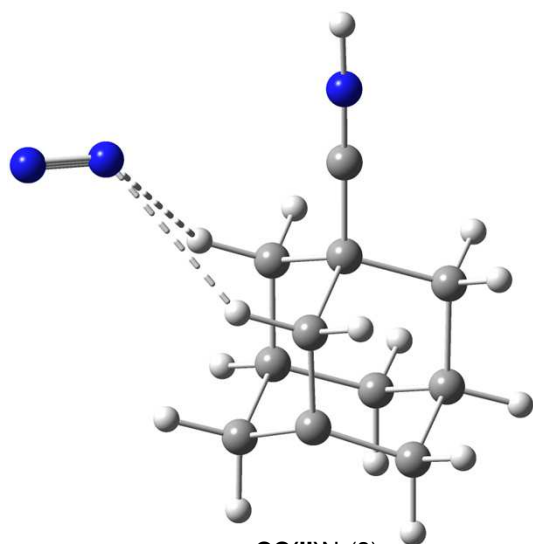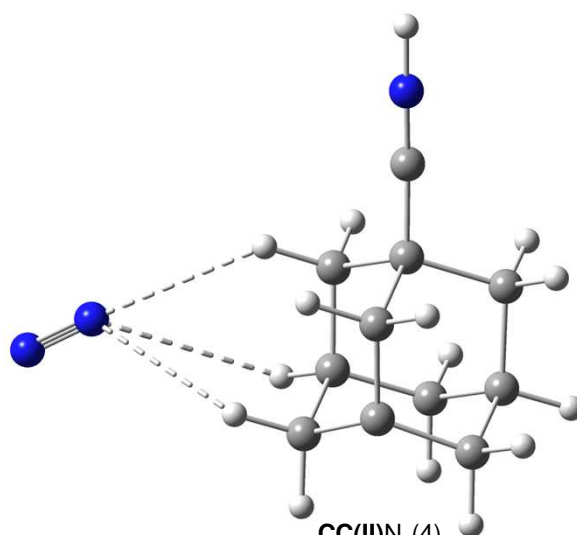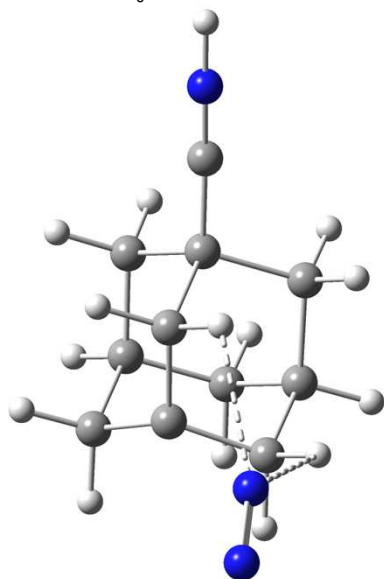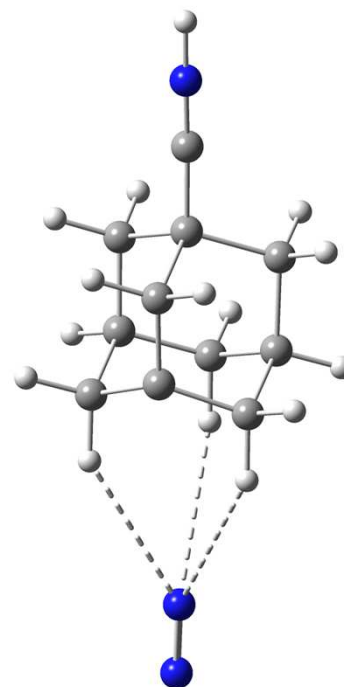

Figure S5

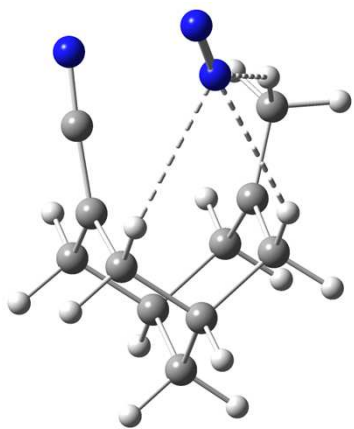

**OC(I)N<sub>2</sub>(1)**  
 $E_0=0.00$   
 $D_0=11.51$

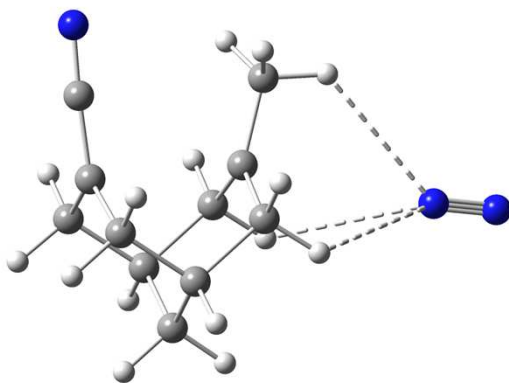

**OC(I)N<sub>2</sub>(2)**  
 $E_0=0.20$   
 $D_0=11.31$

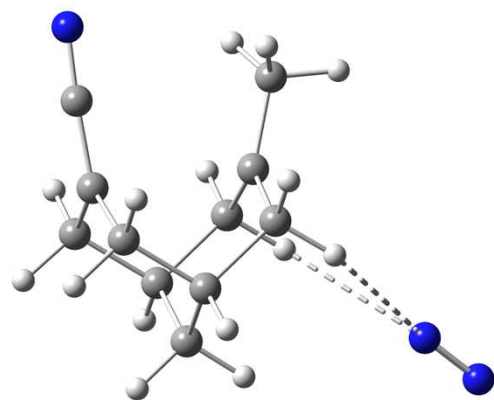

**OC(I)N<sub>2</sub>(3)**  
 $E_0=0.72$   
 $D_0=10.79$

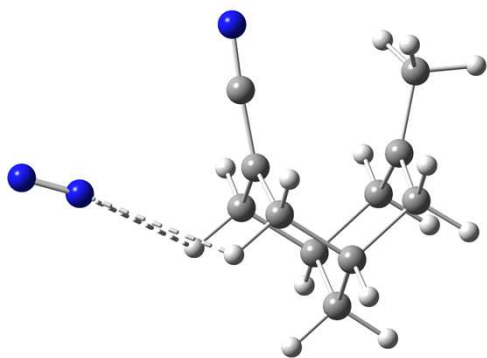

**OC(I)N<sub>2</sub>(4)**  
 $E_0=1.60$   
 $D_0=9.91$

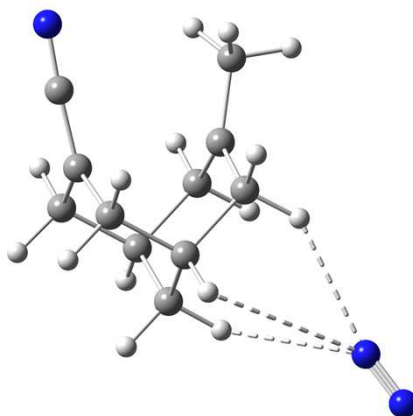

**OC(I)N<sub>2</sub>(5)**  
 $E_0=2.10$   
 $D_0=9.41$

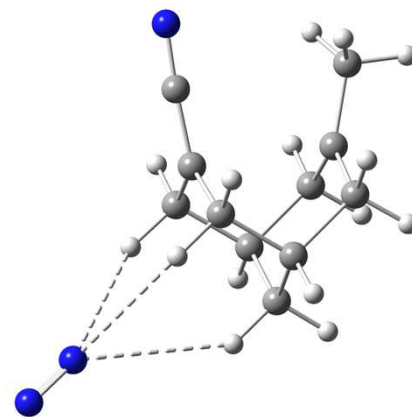

**OC(I)N<sub>2</sub>(6)**  
 $E_0=2.26$   
 $D_0=9.25$

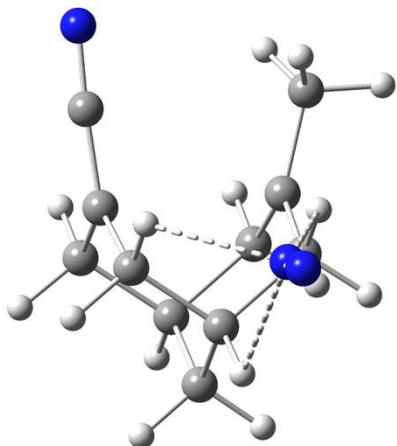

**OC(I)N<sub>2</sub>(7)**  
 $E_0=2.45$   
 $D_0=9.06$

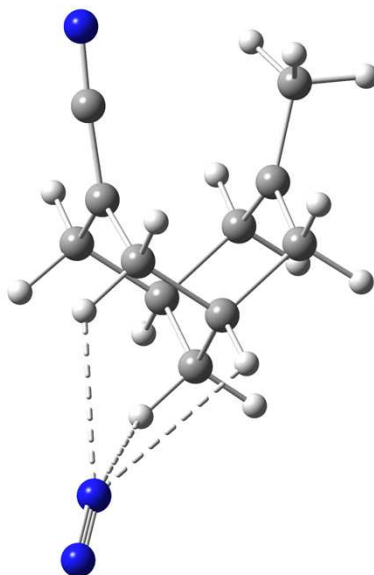

**OC(I)N<sub>2</sub>(8)**  
 $E_0=2.96$   
 $D_0=8.55$

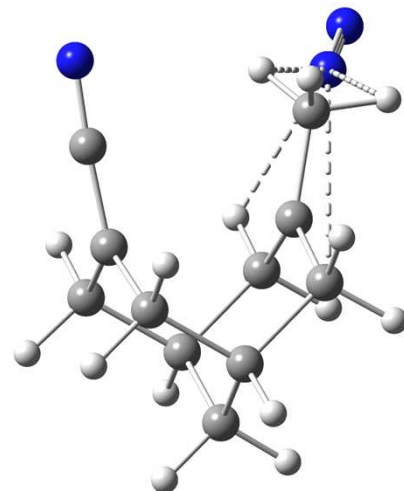

**OC(I)N<sub>2</sub>(9)**  
 $E_0=2.97$   
 $D_0=8.54$

Figure S6

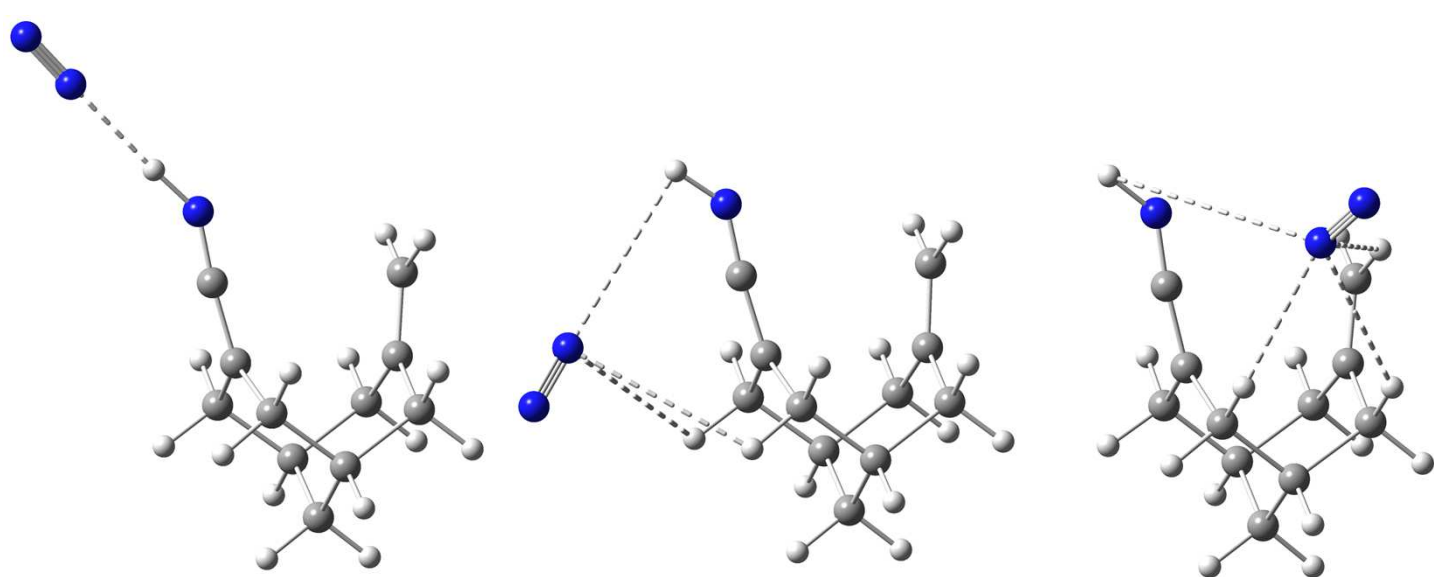

**OC(II)N<sub>2</sub>(1)**  
 $E_0=0.00$   
 $D_0=17.24$

**OC(II)N<sub>2</sub>(2)**  
 $E_0=7.80$   
 $D_0=9.44$

**OC(II)N<sub>2</sub>(3)**  
 $E_0=8.21$   
 $D_0=9.03$

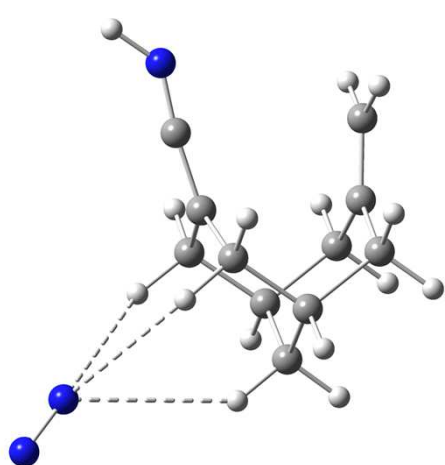

**OC(II)N<sub>2</sub>(4)**  
 $E_0=8.21$   
 $D_0=9.03$

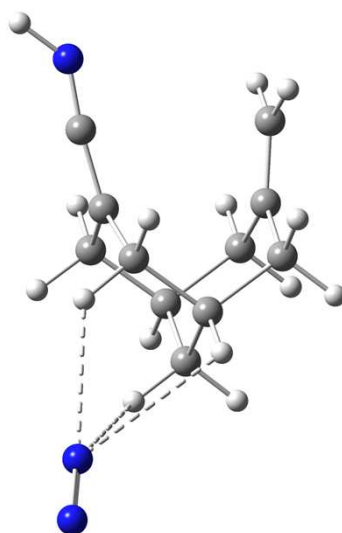

**OC(II)N<sub>2</sub>(5)**  
 $E_0=8.66$   
 $D_0=8.58$

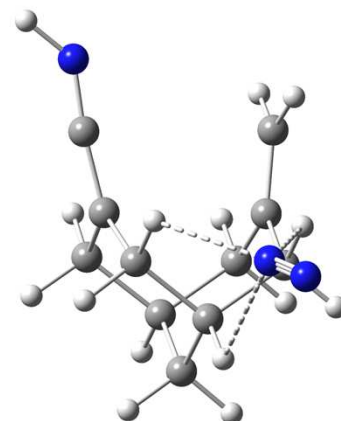

**OC(II)N<sub>2</sub>(6)**  
 $E_0=9.43$   
 $D_0=7.81$

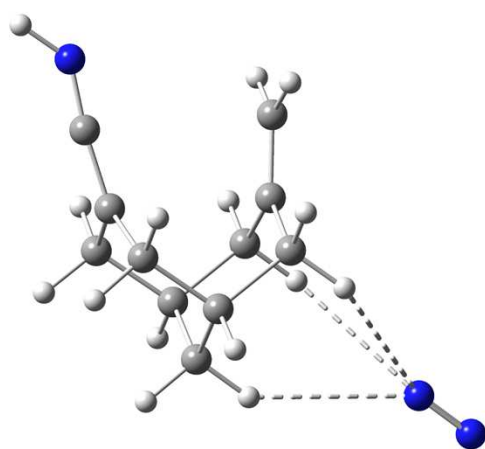

**OC(II)N<sub>2</sub>(7)**  
 $E_0=9.48$   
 $D_0=7.76$

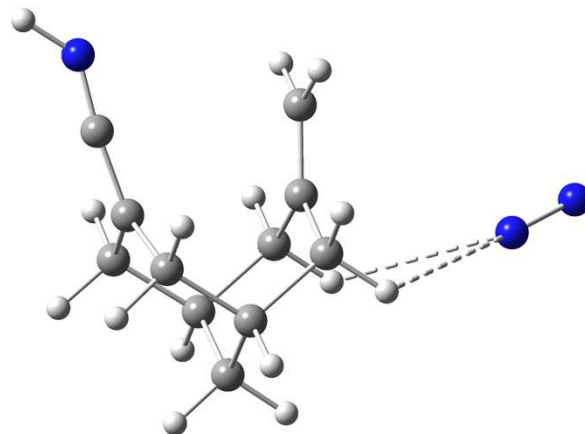

**OC(II)N<sub>2</sub>(8)**  
 $E_0=9.71$   
 $D_0=7.53$

Figure S7



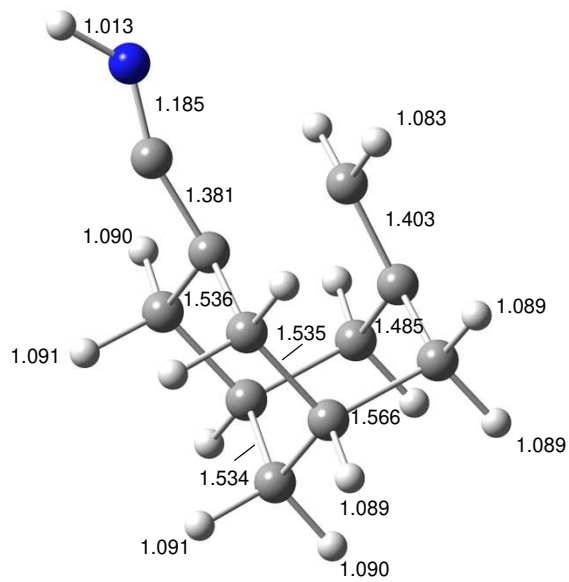

**TS(I)**

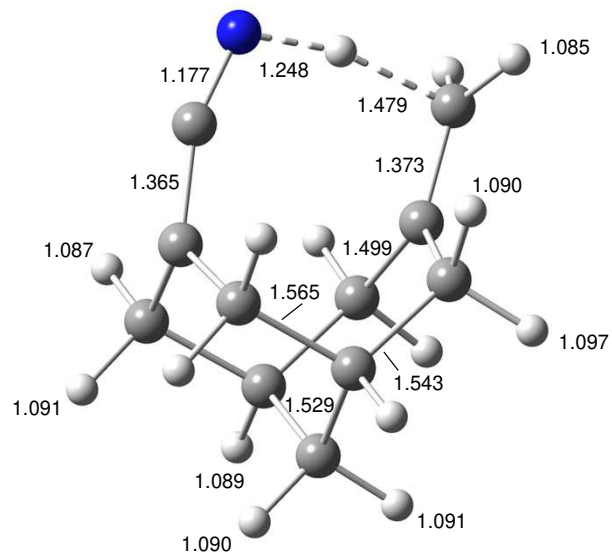

**TS(II)**

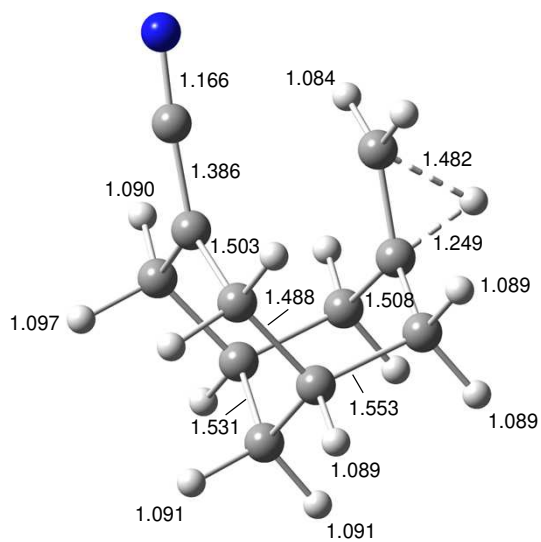

**TS(III)**

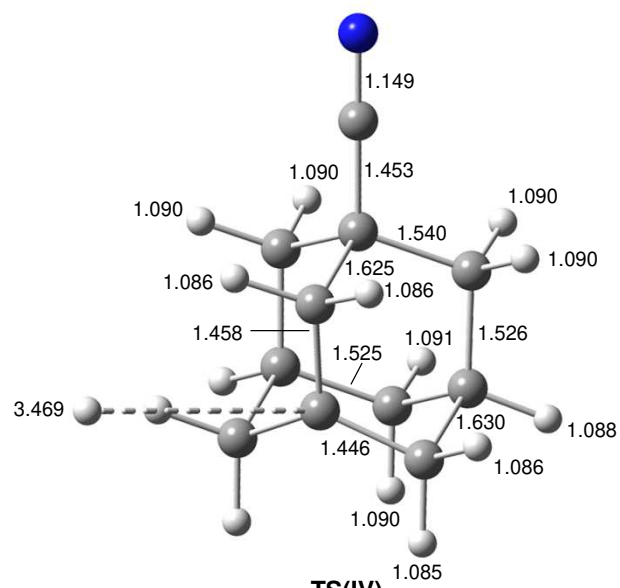

**TS(IV)**

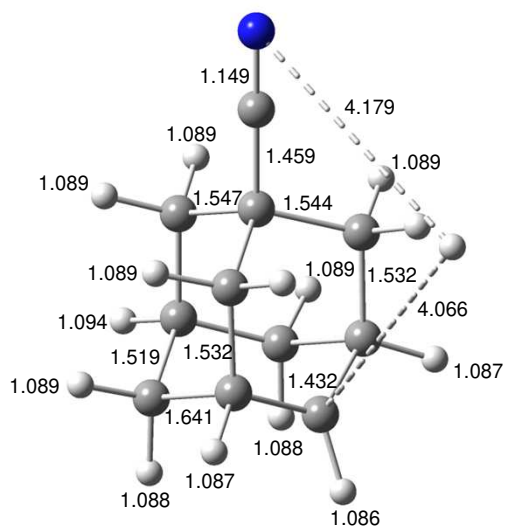

**TS(V)**

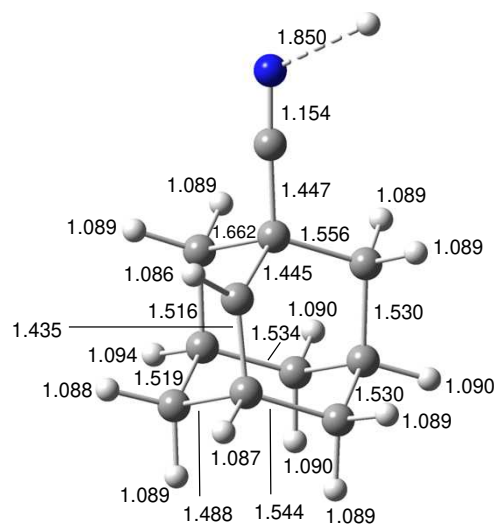

**TS(VI)**

Figure S8

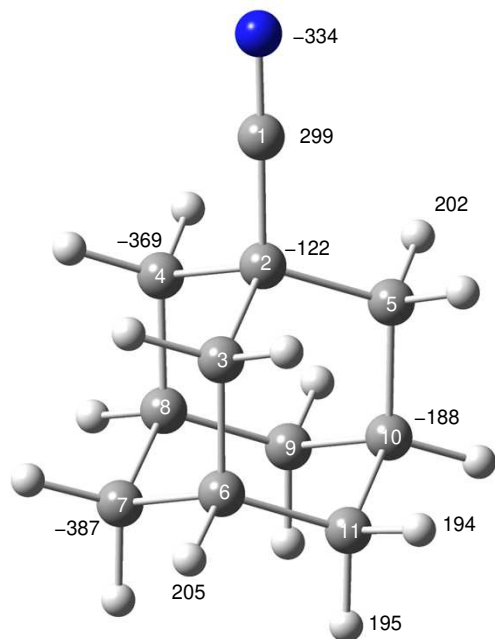

AdCN ( $C_{3v}$ )

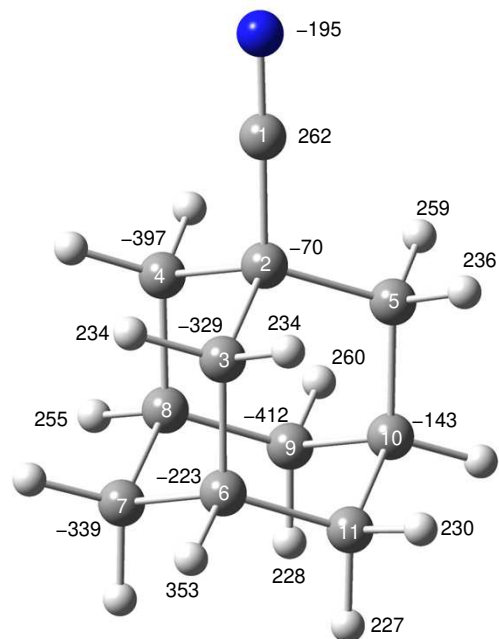

CC(I) ( $C_s$ )

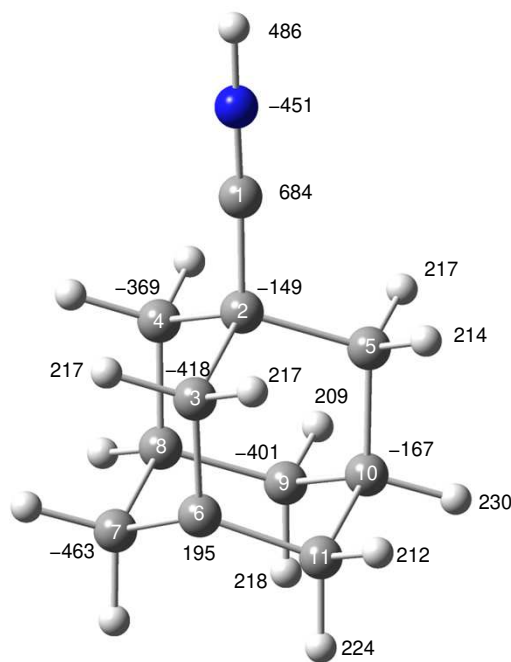

CC(II) ( $C_s$ )

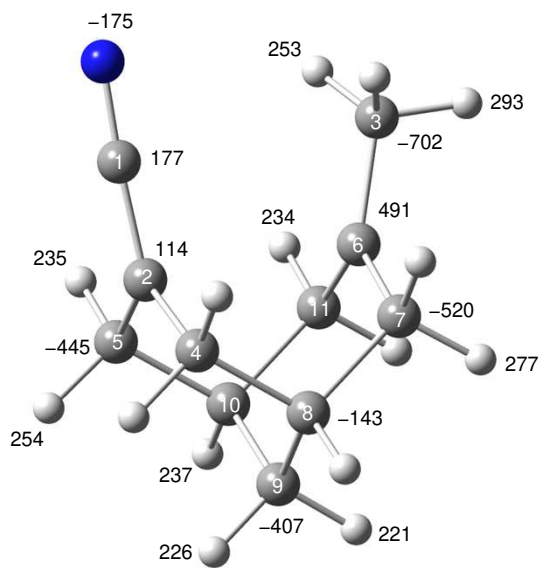

OC(I) ( $C_s$ )

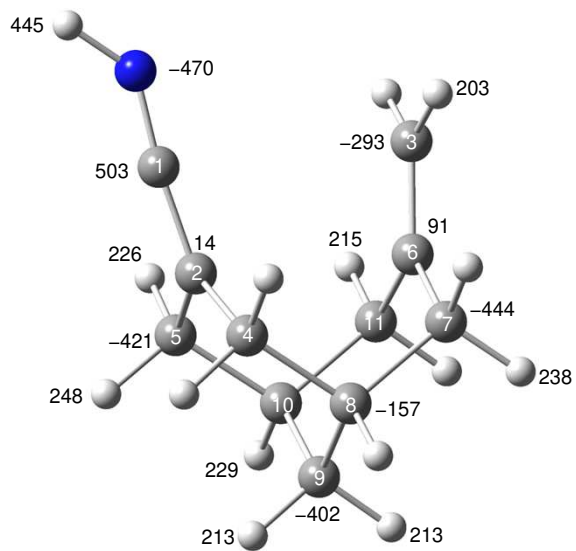

OC(II) ( $C_s$ )

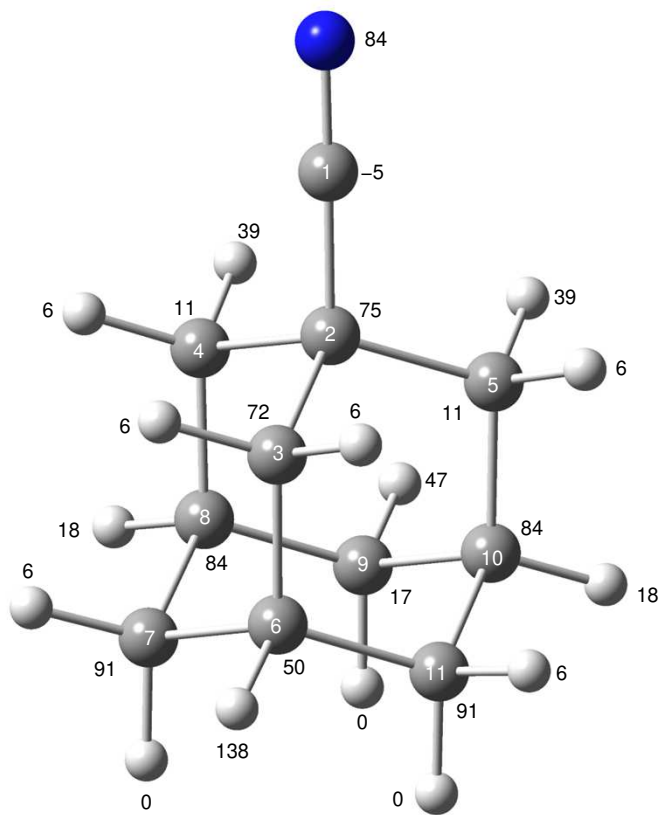

**CC(I)** ( $C_s$ )

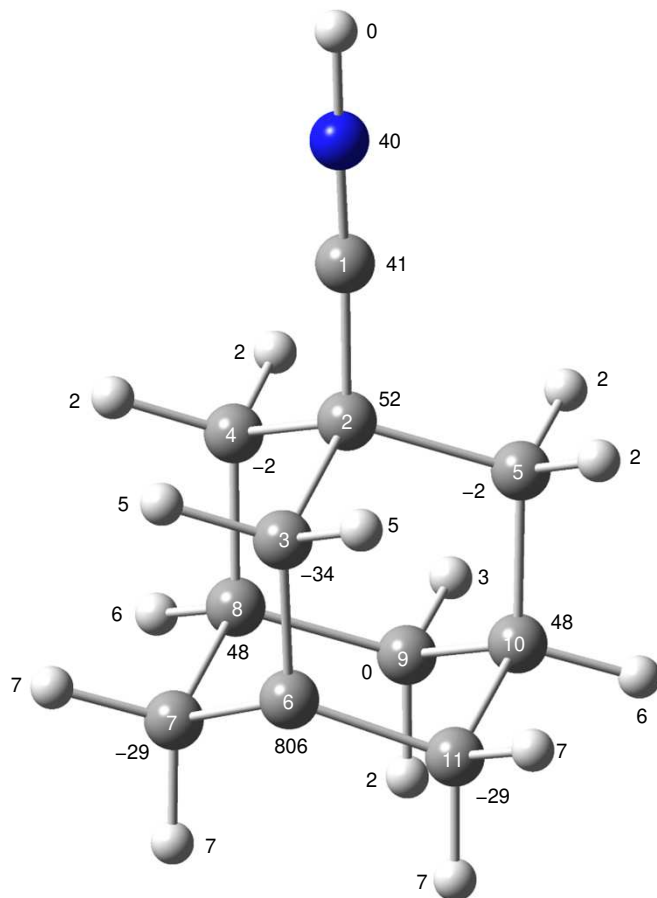

**CC(II)** ( $C_s$ )

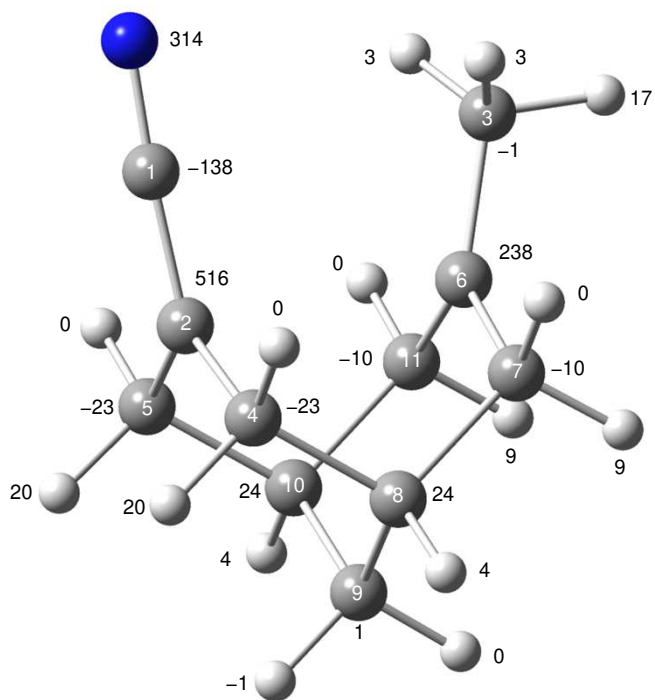

**OC(I)** ( $C_s$ )

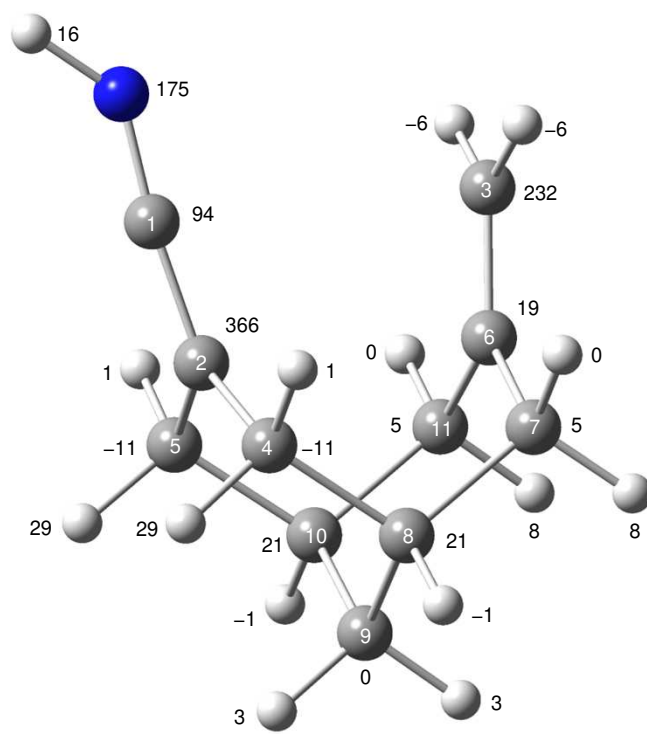

**OC(II)** ( $C_s$ )

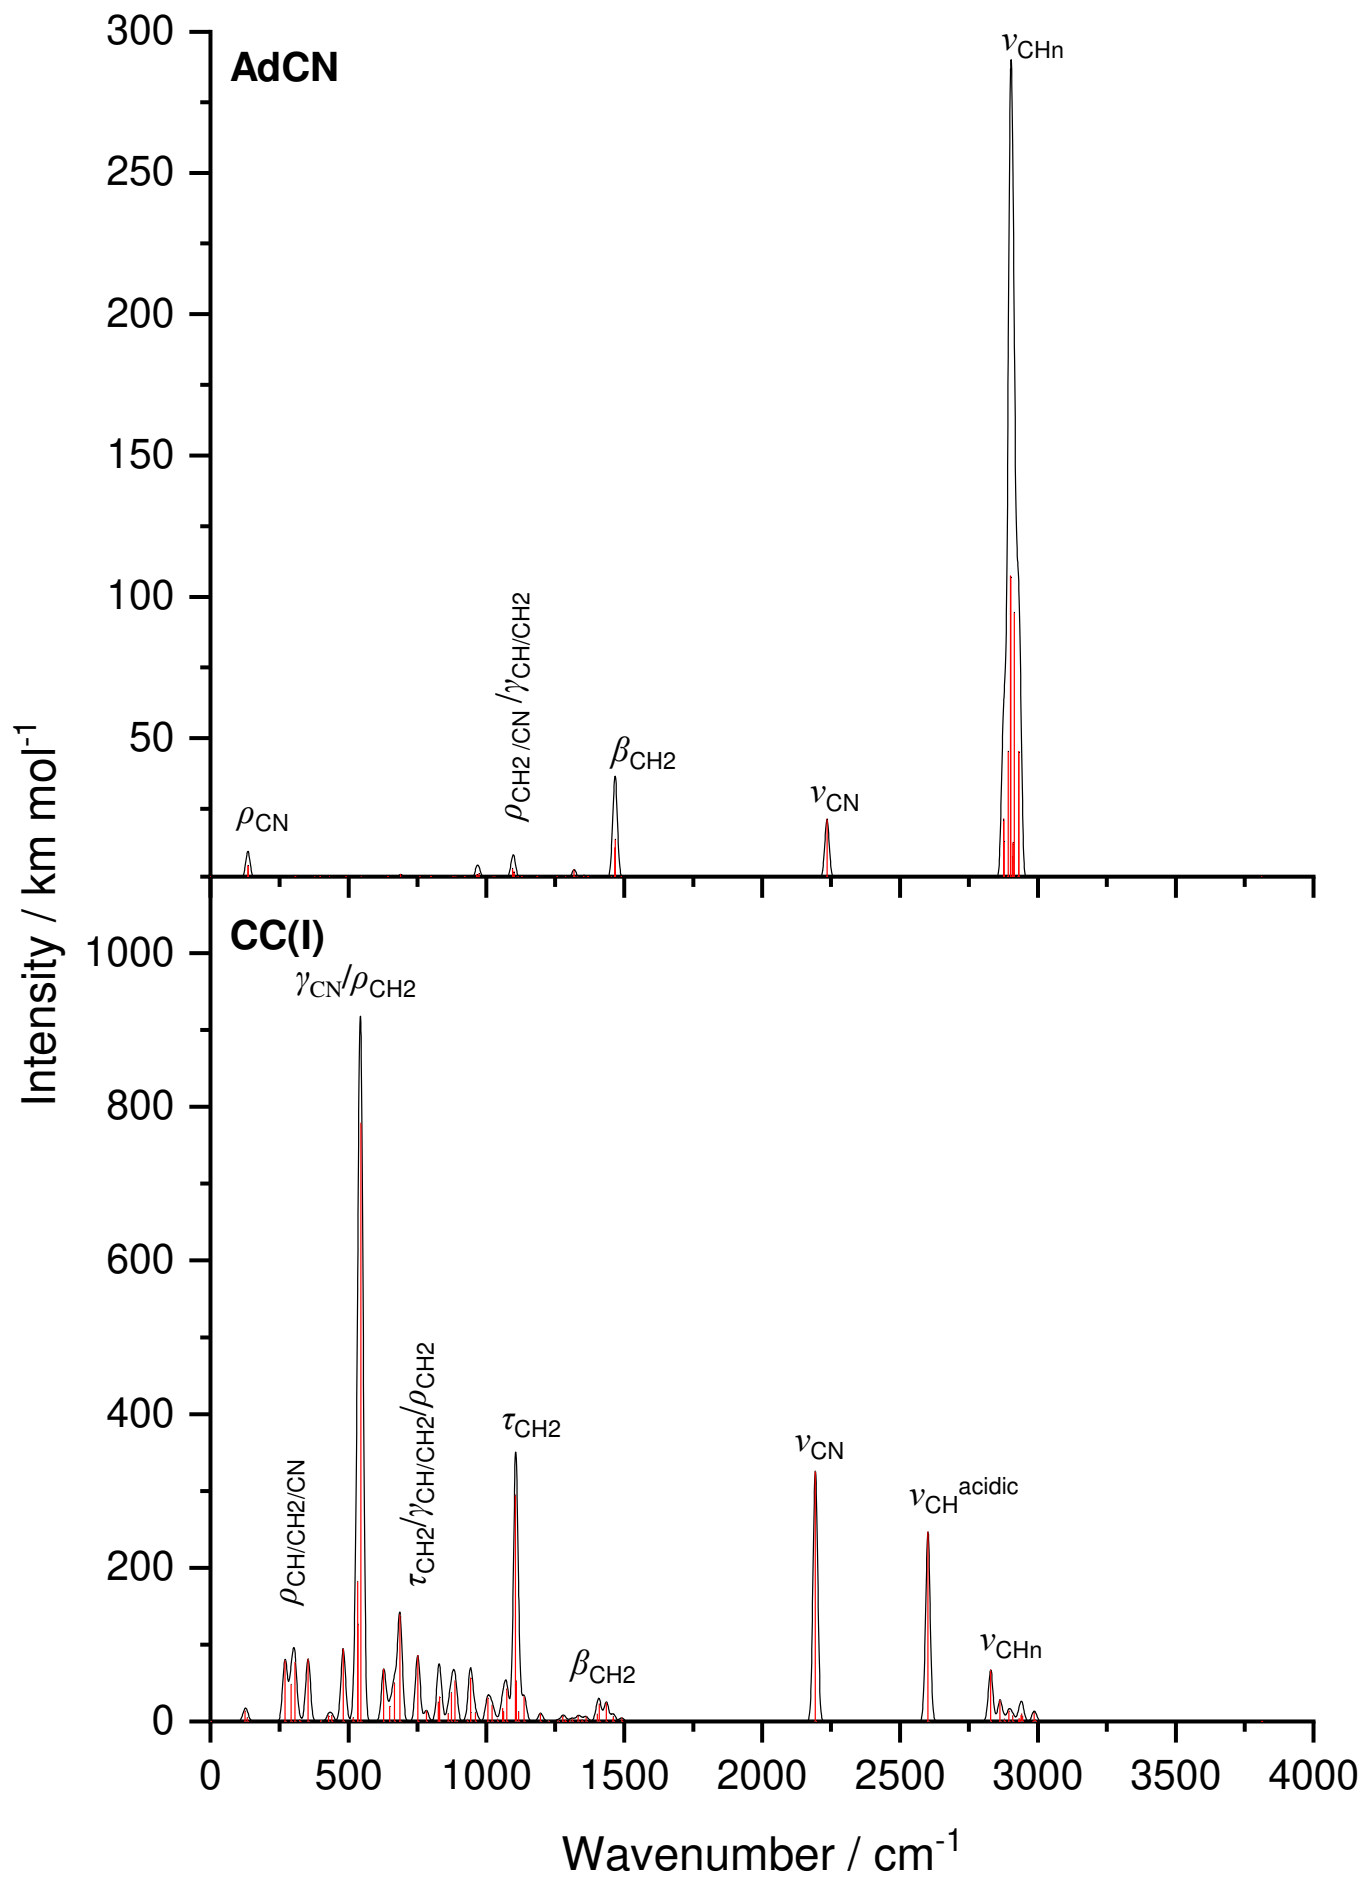

Figure S11

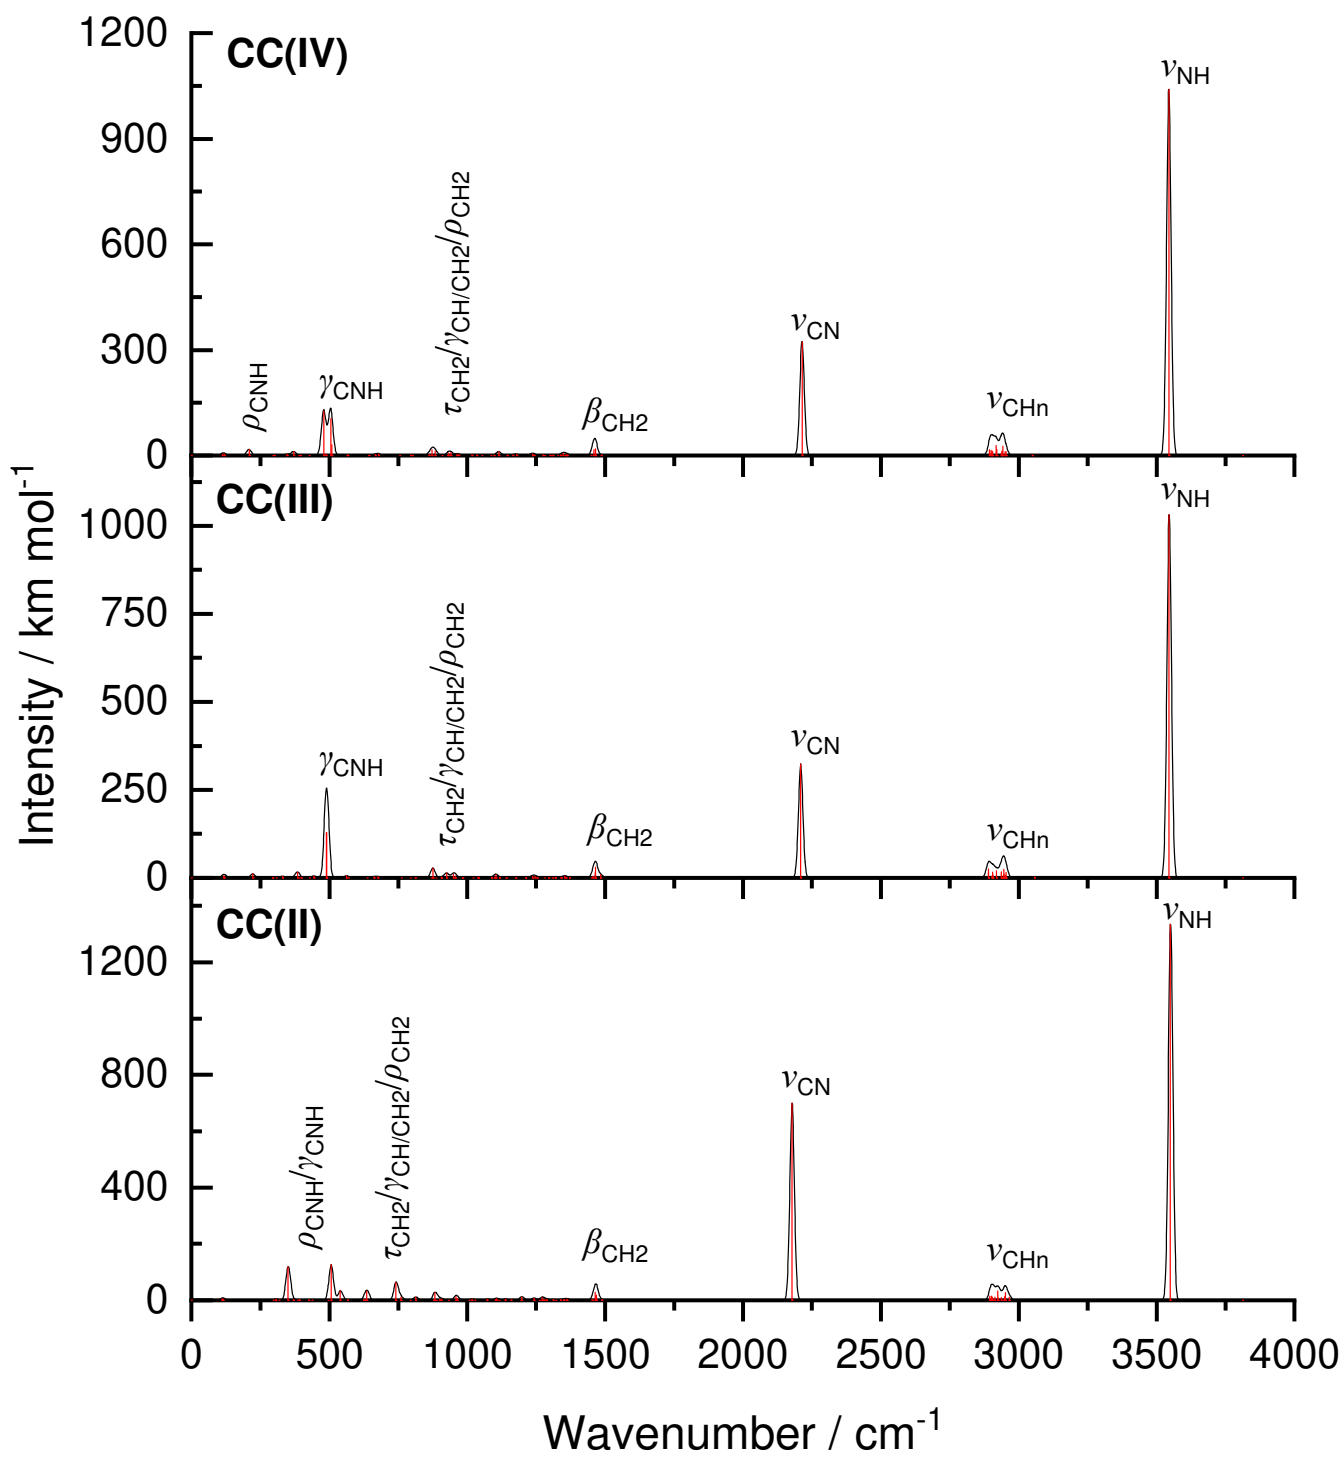

Figure S12

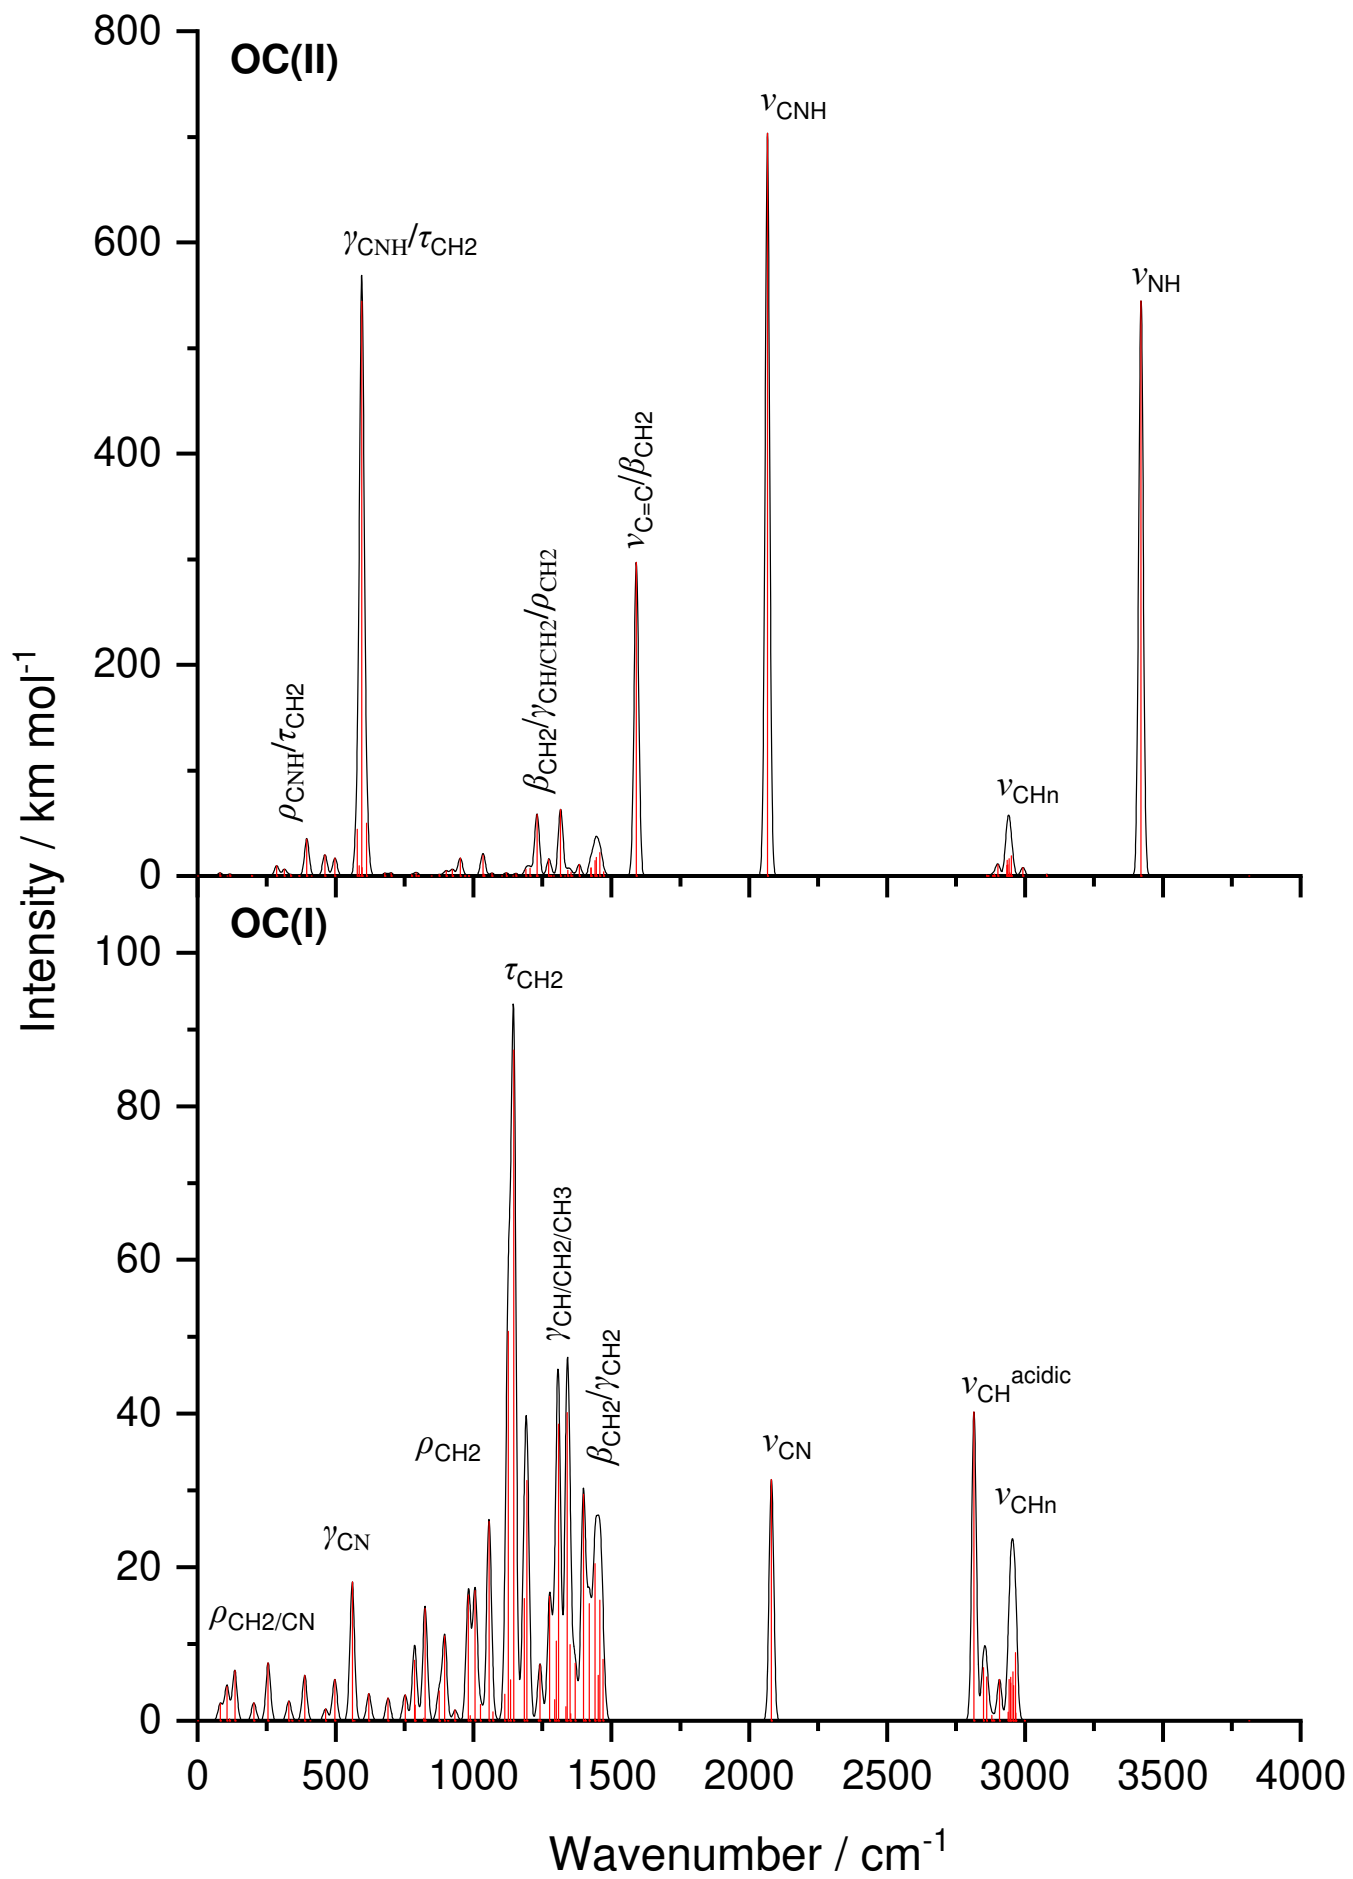

Figure S13

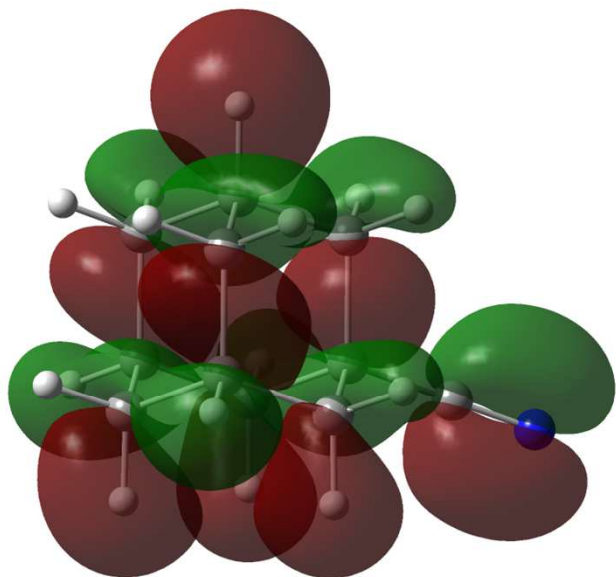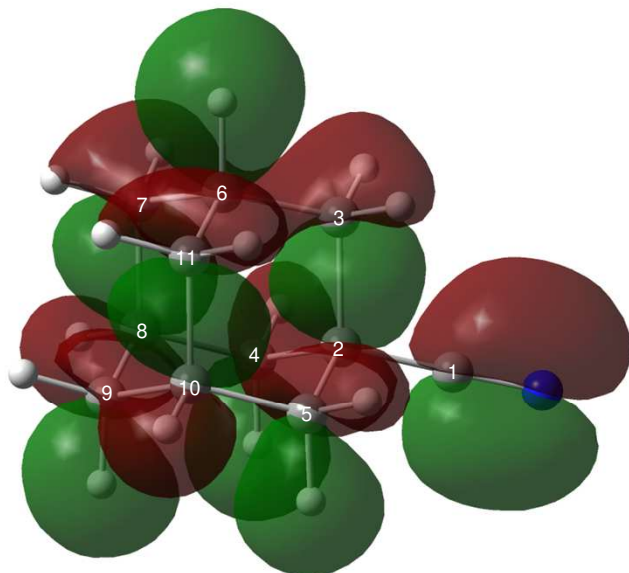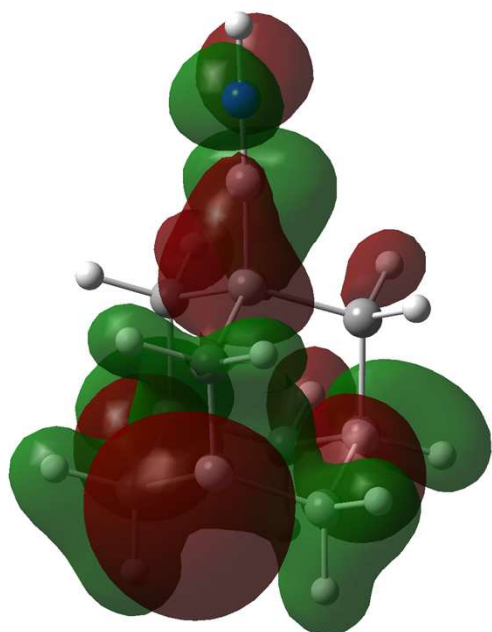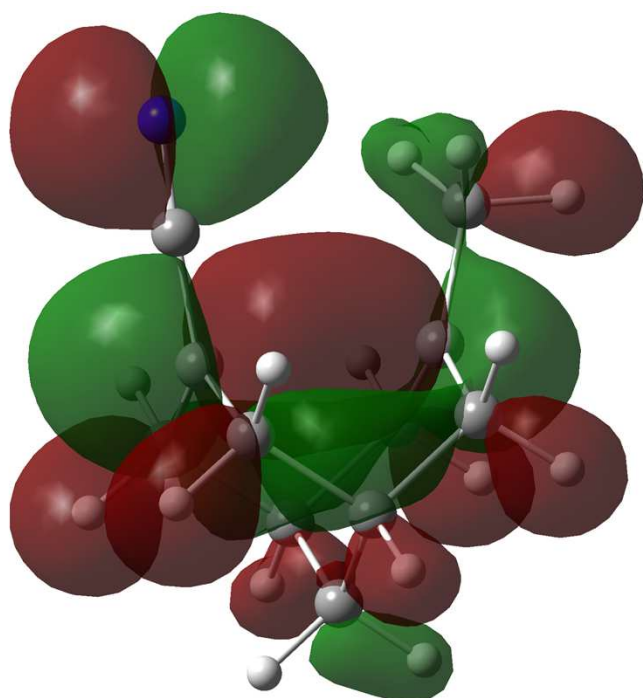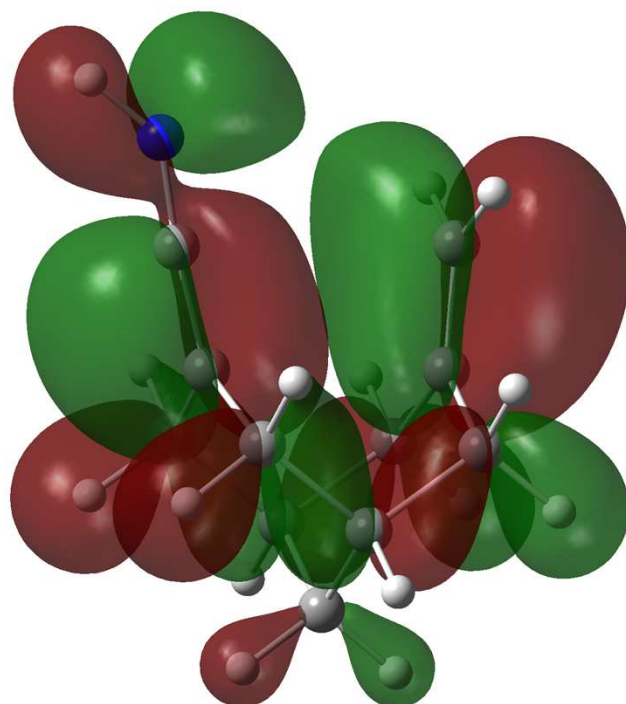



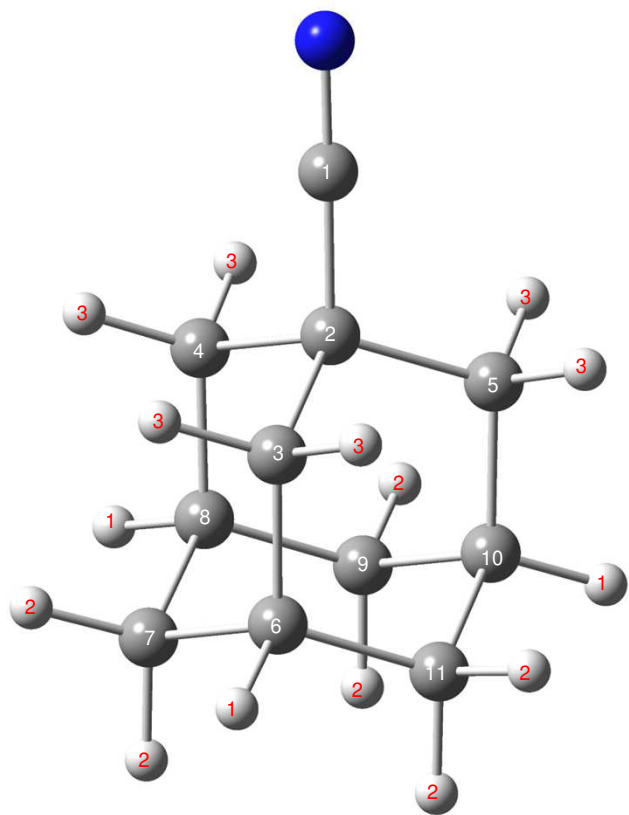

CC(I) ( $C_s$ )

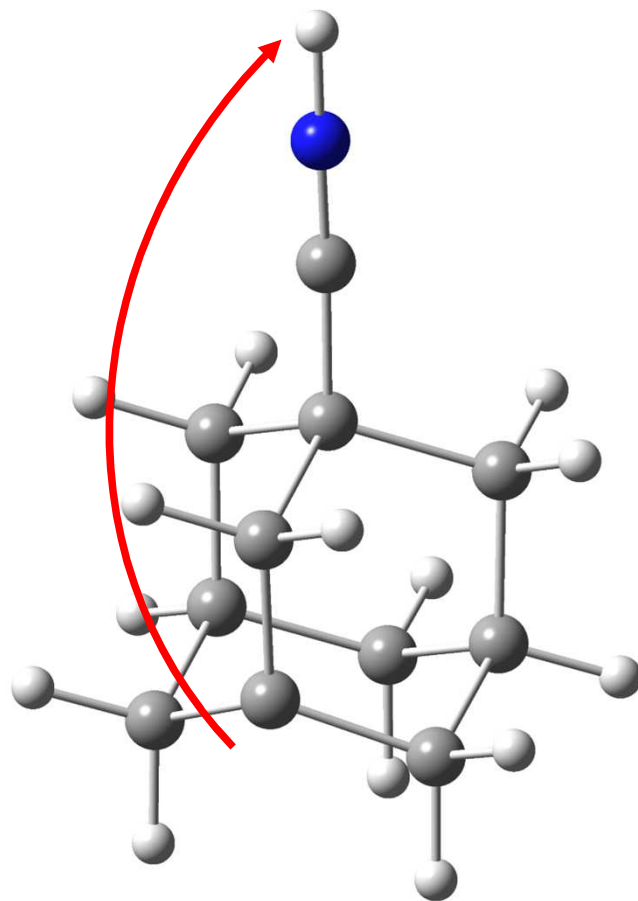

CC(II) ( $C_s$ )

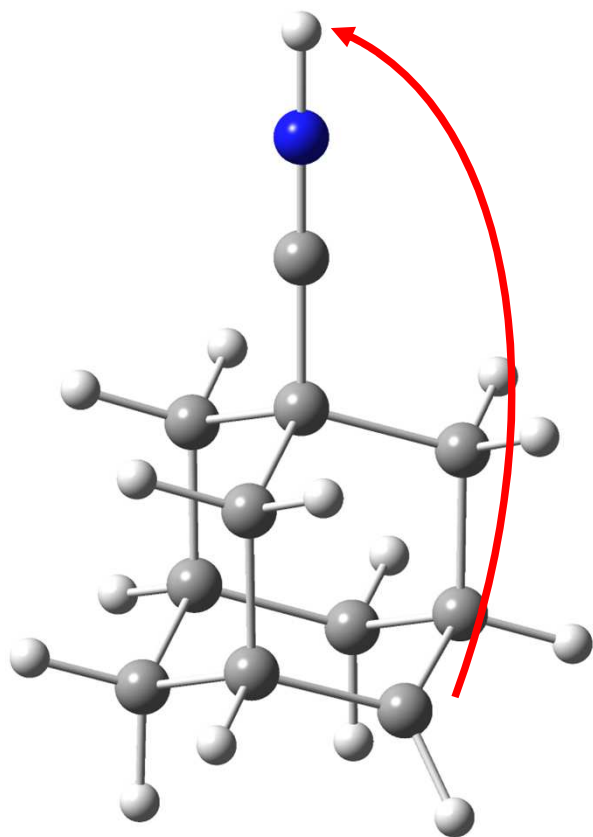

CC(III) ( $C_s$ )

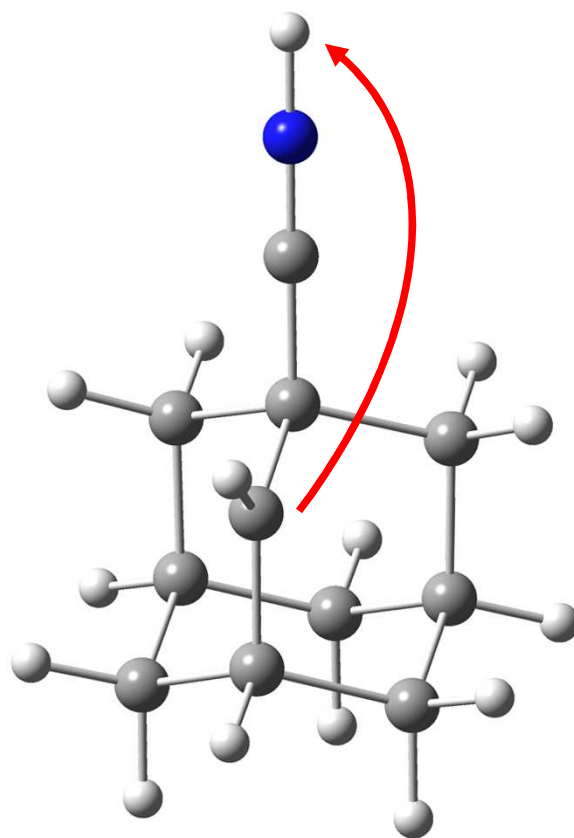

CC(IV) ( $C_s$ )
